1 Research Article

2 **Hematopoietic stem cell requirement**  
3 **for macrophage regeneration is tissue-specific**

4  
5 Running Title: Macrophage origins are tissue-specific

6  
7 Devon J. Eddins<sup>\*, †, ‡, 1</sup>, Astrid Kusters<sup>\*, 1</sup>, Jeffrey Waters<sup>§</sup>, Jasmine Sosa<sup>§</sup>, Megan Phillips<sup>§</sup>,  
8 Koshika Yadava<sup>¶, ||</sup>, Leonore A. Herzenberg<sup>§</sup>, Hedwich F. Kuipers<sup>¶, #</sup>, Eliver Eid Bou Ghosn<sup>\*, †, ‡</sup>

9  
10 <sup>\*</sup>Lowance Center for Human Immunology, Department of Medicine, Division of Immunology  
11 and Rheumatology, Emory University School of Medicine, Atlanta, GA 30322, USA

12 <sup>†</sup>Department of Pediatrics, Division of Rheumatology, Emory University School of Medicine,  
13 Atlanta, GA 30322, USA

14 <sup>‡</sup>Emory Vaccine Center, Yerkes National Primate Research Center, Emory University School of  
15 Medicine, Atlanta, GA 30322, USA

16 <sup>§</sup>Department of Genetics, Stanford University, Stanford, CA 94305, USA

17 <sup>¶</sup>Department of Medicine, Division of Infectious Diseases and Geographic Medicine, Stanford  
18 University School of Medicine, Stanford, CA 94305, USA

19 <sup>||</sup>Current address: Friedrich Miescher Institute for Biomedical Research (FMI), Maulbeerstrasse  
20 66, 4058 Basel, Switzerland

21 <sup>#</sup>Current address: Departments of Clinical Neurosciences and Cell Biology & Anatomy,  
22 Cumming School of Medicine, University of Calgary, Calgary, AB T2N 4N1, Canada

23 <sup>1</sup>Joint first authors

24

25 ***Corresponding author contact info***

26 Eliver E.B. Ghosn: Lowance Center for Human Immunology, Health Sciences Research  
27 Building, 1760 Haygood Dr. NE, E240, Atlanta, GA 30322, USA; tel: +1-404-712-3211; email:  
28 eliver.ghosn@emory.edu  
29

30 **Abstract**

31 Tissue-resident macrophages (TRM $\Phi$ ) are important immune sentinels responsible for  
32 maintaining tissue and immune homeostasis within their specific niche. Recently, the origins of  
33 TRM $\Phi$  have undergone intense scrutiny where now most TRM $\Phi$  are thought to originate early  
34 during embryonic development independent of hematopoietic stem cells (HSCs). We previously  
35 characterized two distinct subsets of mouse peritoneal cavity macrophages (Large and Small  
36 Peritoneal Macrophages; LPM and SPM, respectively) whose origins and relationship to both  
37 fetal and adult long-term (LT)-HSCs have not been fully investigated. Here we employ highly  
38 purified LT-HSC transplantation and in vivo lineage tracing to show a dual ontogeny for LPM  
39 and SPM, where the initial wave of peritoneal macrophages is seeded from yolk sac-derived  
40 precursors, which later require LT-HSCs for regeneration. In contrast, transplanted fetal and  
41 adult LT-HSCs are not able to regenerate brain-resident microglia. Thus, we demonstrate that  
42 LT-HSCs retain the potential to develop into TRM $\Phi$ , but their requirement is tissue-specific.

43

## 44 **Introduction**

45 Virtually all known organs in vertebrates contain tissue-resident macrophages (TRM $\Phi$ ) that  
46 serve important roles in maintaining tissue and immune homeostasis therein (Davies et al.,  
47 2013a; Li and Barres, 2018; Wynn et al., 2013). It was long assumed that all macrophages (M $\Phi$ )  
48 develop from monocytes generated by hematopoietic stem cells (HSCs) in the bone marrow  
49 (BM) (Osawa et al., 1996; Smith et al., 1991; Till and McCulloch, 1980; van Furth and Cohn,  
50 1968). However, in recent years, an overwhelming body of evidence has overtly challenged the  
51 notion that TRM $\Phi$  are solely derived from HSCs (Ginhoux et al., 2010; Gomez Perdiguero et al.,  
52 2015a; Yona et al., 2013). Collectively, these studies have established that most TRM $\Phi$   
53 populations develop during embryogenesis from yolk sac progenitors that emerge prior to, and  
54 independent of, long-term (LT)-HSCs. Tissue-resident macrophages, including brain microglia  
55 (Ginhoux et al., 2010) and skin Langerhans cells (Gomez Perdiguero et al., 2015a; Hoeffel et al.,  
56 2015), emerge at around embryonic day 8 (E8) in a region of the yolk sac known as the blood  
57 island, before the development of the first definitive LT-HSC (which starts at E10.5) (Ghosn et  
58 al., 2019). Before birth, these yolk sac-derived M $\Phi$  migrate and take long-term residence in the  
59 various tissues (i.e., brain and skin) of the developing embryo. Fate-mapping (Buttgereit et al.,  
60 2016; Ginhoux et al., 2010; Gomez Perdiguero et al., 2015a; Yona et al., 2013) and parabiosis  
61 (Ajami et al., 2007; Hashimoto et al., 2013; Huang et al., 2018) experiments show that TRM $\Phi$   
62 are maintained throughout adulthood by *in situ* self-renewal, with minimal contribution from LT-  
63 HSC-derived circulating monocytes.

64  
65 We previously identified and characterized two functionally distinct subsets of TRM $\Phi$  in the  
66 mouse peritoneal cavity (PerC), namely Large and Small Peritoneal Macrophages (LPM and  
67 SPM, respectively) (Ghosn et al., 2010). In subsequent years, various studies demonstrating that  
68 most TRM $\Phi$  (i.e., microglia, Kupffer cells, Langerhans cells, etc.) develop from HSC-  
69 independent, yolk sac-derived fetal progenitors (Gomez Perdiguero et al., 2015a), have led some  
70 researchers to speculate that LPM and SPM are also likely to develop independently of LT-HSCs  
71 (Cassado et al., 2015). Although peritoneal macrophages are one of the most studied TRM $\Phi$   
72 populations, with much previously done to identify the functional and developmental differences  
73 between LPM and SPM (Bain et al., 2016; Broche and Tellado, 2001; Cain et al., 2013; Ghosn et  
74 al., 2010), their origins and relationship to both fetal and adult LT-HSCs have not been fully

75 investigated and remains controversial. Despite the mounting evidence supporting the notion that  
76 TRM $\Phi$  originate from HSC-independent yolk sac-derived progenitors (Gomez Perdiguero et al.,  
77 2015a; Gomez Perdiguero et al., 2015b) and/or fetal liver monocytes (Hoeffel et al., 2012;  
78 Hoeffel et al., 2015), opposing studies have suggested that all TRM $\Phi$ , with the exception of  
79 microglia and a fraction of Langerhans cells, are instead derived from fetal LT-HSCs (Sheng et  
80 al., 2015a, Sheng et al., 2015b). Although these two hypotheses are not necessarily mutually  
81 exclusively, they have not been tested simultaneously. Most importantly, the potential of highly  
82 purified and transplanted *bona fide* LT-HSCs, from both fetal and adult sources, to fully  
83 regenerate TRM $\Phi$  *in vivo* (including LPM, SPM, and microglia) has not been tested.

84

85 To resolve these seemingly contradictory findings and determine whether certain TRM $\Phi$  show  
86 single or dual ontogeny, we directly tested the potential of highly purified fetal and adult LT-  
87 HSCs to regenerate TRM $\Phi$  in the peritoneum and brain of lethally-irradiated recipient mice. We  
88 show that both fetal and adult LT-HSCs fully regenerate tissue-resident LPM and SPM  
89 populations, but completely fail to regenerate tissue-resident microglia. On the other hand, using  
90 *Runx1* lineage-tracing, we show that, similar to brain microglia, E8 progenitors can also give rise  
91 to both LPM and SPM independently of LT-HSCs. In conclusion, our studies show a dual  
92 ontogeny for tissue-resident LPM and SPM (i.e., HSC-independent and HSC-dependent), and  
93 confirm the HSC-independent origin for brain microglia. Importantly, we directly demonstrate  
94 that brain microglia, unlike LPM and SPM, cannot be regenerated by transplantation of purified  
95 *bona fide* fetal LT-HSCs, even after the host received lethal, full-body irradiation. Collectively,  
96 these findings add a new layer to the complex developmental landscape of the myeloid lineage  
97 and challenge the current notion that LPM and SPM have divergent and distinct origins.

98

## 99 **Materials and Methods**

### 100 ***Mice and Tissue Preparation.***

101 C57BL/6 and Gt(ROSA)26Sor<sup>tm4</sup>(ACTB-tdTomato,-EGFP)<sup>Luo</sup>/J (ROSA<sup>mT/mG</sup>, Stock No: 007576) mice  
102 (8-10 wks) were purchased from Jackson Laboratory (Bay Harbor, ME, USA). Transgenic mice  
103 expressing enhanced green (pCx-eGFP) (Wright et al., 2001) or red (TM7-RFP) (Ueno and  
104 Weissman, 2006) fluorescent protein were kindly provided by the Weissman laboratory  
105 (Stanford). *Runx1*<sup>MerCreMer</sup> mutant mice were generated by Dr. Igor Samokhvalov and colleagues  
106 (Samokhvalov et al., 2007) and provided by Riken Center for Life Science Technologies  
107 (accession number CDB0524K; <http://www.clst.riken.jp/arg/mutant%20mice%20list.html>;  
108 Wako, Saitama Prefecture, Japan). Mice were housed and bred at Emory and Stanford animal  
109 facilities. *Runx1*<sup>MerCreMer</sup> mice were crossed with ROSA<sup>mT/mG</sup> mice to generate tamoxifen-  
110 inducible fate mapping model (*Runx1*<sup>cre/eGFP</sup>). Timed pregnancies were confirmed via post-coital  
111 plug and embryonic ages were confirmed via microscopy. Peripheral blood from progeny mice  
112 was screened for multi-lineage eGFP<sup>+</sup> cells to ensure LT-HSCs were not labeled prior to being  
113 used in experiments. All procedures were approved by both Emory and Stanford Institutional  
114 Animal Care and Use Committees (IACUC) in compliance with the recommendations in the  
115 Guide for the Care and Use of Laboratory Animals of the National Institutes of Health and  
116 follow administrative panel on laboratory animal care (APLAC) guidelines.

117  
118 Blood (~200  $\mu$ L) was drawn via tail vein into EDTA-containing tubes (BD Diagnostics).  
119 Peritoneal cavity (PerC) cells were harvested by PerC lavage with 7 mL of custom RPMI-1640  
120 media deficient in biotin, L-glutamine, phenol red, riboflavin, and sodium bicarbonate, with 3%  
121 newborn calf serum and benzonase (defRPMI). Bone marrow (BM) from femurs and tibias were  
122 flushed with defRPMI using 28G needle and 30 mL syringe (BD Medical). Cells were passed  
123 through a 70  $\mu$ m nylon filter (Corning) and erythrocytes were lysed using ACK lysis buffer.  
124 Whole brains from mice were mechanically dissociated using a Dounce homogenizer then gently  
125 passed through a 70  $\mu$ m filter and centrifuged at 300 g, 4°C, 10 min. Cells were resuspended in a  
126 28% isotonic Percoll cushion (GE Healthcare) and centrifuged (900 g, 4°C, 30 min.) to remove  
127 myelin. Fetal livers were harvested from  $\geq$ E15 timed pregnant mice, digested at 37°C for 30 min.  
128 with 0.25% collagenase I (Stem Cell Technologies), then again using enzyme-free cell

129 dissociation buffer (Gibco). Liver cells were passed through 70  $\mu\text{m}$  filter to obtain single cell  
130 suspensions.

131

### 132 ***Tamoxifen treatment.***

133 Homozygous male ROSA<sup>mT/mG</sup> mice were mated with heterozygous female *Runx1*<sup>MerCreMer</sup> mice  
134 overnight (at 18:00). Female mice were examined for post-coital plug the following morning (at  
135 08:00), and those with a plug were considered pregnant and timed E0.5. Pregnant mice received  
136 a single dose of 0.1 mg/g body weight (Z)-4-Hydroxytamoxifen supplemented with 0.05 mg/g  
137 body weight progesterone resuspended in corn oil (all from Sigma-Aldrich) via intraperitoneal  
138 (i.p.) injection at E8. Progesterone supplementation counteracts estrogen receptor antagonism by  
139 tamoxifen to circumvent fetal abortions.

140

### 141 ***18-parameter High-Dimensional (Hi-D) Flow Cytometry.***

142 Cells were resuspended at  $\leq 1 \times 10^7$  cells/mL in defRPMI and stained on ice for 30 min. (or 60  
143 min. when staining for CD34) with the following fluorochrome-conjugated mAbs (see Table S1  
144 for clones and sources). Briefly, for recipient PerC: anti- CD5, CD19, F4/80, NK1.1, IgM, IgK,  
145 VH11, CD23, I-A/I-E, CD11b, Gr-1, CD45, and B220; Brain: anti- CD11b, F4/80, CX3CR1,  
146 CD5, CD19, CD11c, CD45, CD23, Gr-1, Ly-6C, CD43, I-A/I-E, and CD16/32; and blood: anti-  
147 TER-119, CD5, CD45, Ly-6C, Gr-1, CD11b, NK1.1, and CD19. Cells were stained on ice for 15  
148 min with Qdot605- or BV711-conjugated streptavidin to reveal biotin-coupled antibodies (see  
149 Table S1). Stained cells were re-suspended in 10  $\mu\text{g}/\text{mL}$  propidium iodide (PI) to exclude dead  
150 cells. When cells were fixed, amine-reactive dyes were used to exclude dead cells. Both GFP and  
151 RFP were detected concomitantly with the reagents described above for a total of 18-parameter  
152 Hi-D FACS. Cells were analyzed on Emory Pediatric/Winship Flow Cytometry Core or Stanford  
153 Shared FACS Facility instruments (BD LSRII). Data were collected for  $0.2\text{--}3 \times 10^6$  cells and  
154 analyzed with FlowJo (FlowJo LLC). To distinguish auto-fluorescent cells from cells expressing  
155 low levels of a particular surface marker, we established upper thresholds for auto-fluorescence  
156 by staining samples with fluorescence-minus-one (FMO) control stain sets in which a reagent for  
157 a channel of interest is omitted.

158

### 159 ***Sorting and transfer.***

160 Fetal liver from ~E15 TM7-RFP (RFP<sup>+</sup>) mice were processed as described above and stained  
161 with the following mAbs in a 15-color, 17-parameter staining combination: anti- SCA-1, CD38,  
162 CD150, CD34, CD48, CD117, CD41, CD45, CD127, CD135, CD19, and lineage markers (Lin)  
163 anti- CD3 $\epsilon$ , B220, NK1.1, Gr-1, CD11b, TER-119 (Table S1). Cells were stained on ice for 15  
164 min with BV711-conjugated streptavidin to reveal biotin-coupled mAbs and re-suspended in PI,  
165 to exclude dead cells. RFP<sup>+</sup> or GFP<sup>+</sup> LT-HSCs were identified as Lin<sup>-</sup>, CD117<sup>hi</sup>, SCA-1<sup>hi</sup>,  
166 CD150<sup>+</sup>, CD48<sup>-</sup>, CD41<sup>-</sup>, CD34<sup>low</sup>, CD45<sup>+</sup>, CD38<sup>+</sup>, CD127<sup>-</sup>, and CD135<sup>-</sup> (Fig. S4). Sorted LT-  
167 HSCs were re-suspended in serum free defRPMI and about 100 cells were transferred  
168 intravenously (i.v.) into lethally irradiated (two doses of 4.25 Gy delivered 4 h apart) C57BL/6  
169 mice along with ~2 x 10<sup>5</sup> BM rescue cells from 8 wks old congenic pCx-eGFP (eGFP<sup>+</sup>) mice.  
170 After 30+ wks, recipient PerC, Brain, and blood cells were harvested and LT-HSC-derived  
171 TRM $\Phi$  (RFP<sup>+</sup>) analyzed as described above. To determine TRM $\Phi$  reconstitution potential for  
172 adult BM LT-HSCs, BM from RFP<sup>+</sup> mice were processed and stained as described for fetal liver.  
173 LT-HSCs were sorted on Emory Pediatric/Winship Flow Cytometry Core or Stanford Shared  
174 FACS Facility BD FACSAria II instruments.

175

### 176 ***Chimerism.***

177 Lethally irradiated recipient C57BL/6 (10-20 wks) mice were injected i.v. with either ~100  
178 sorted fetal liver (~E15 embryos) or adult BM (>20 wks) LT-HSCs from donor RFP<sup>+</sup> mice,  
179 along with ~2 x 10<sup>5</sup> adult BM rescue cells from congenic eGFP<sup>+</sup> mice. Co-transfer of the rescue  
180 cells is necessary to prevent the lethally irradiated mice from succumbing from anemia during  
181 the first weeks post-irradiation. It readily provides red and white blood cells until the transferred  
182 LT-HSCs reconstitute all major blood cells. Blood was collected weekly from recipient mice to  
183 determine the level of chimerism, which we defined as the percentage of cells derived from the  
184 donor fetal liver or adult BM LT-HSCs (RFP<sup>+</sup>) found among total blood cells recovered from  
185 recipient mice. Here, we examined the recipient mice that showed full, long-term stable  
186 chimerism (i.e., development of all major hematopoietic lineages, including erythrocytes,  
187 myeloid cells, granulocytes, T cells, and B cells, see Fig. S5). All the reconstituted hematopoietic  
188 lineages from donor cells were still readily detectable in recipient blood when the mice were  
189 sacrificed, and tissues harvested at  $\geq$ 33 wks post transplantation (Fig. S5). A total of 40 recipient  
190 mice received LT-HSC transplantation (13 adult BM and 27 fetal liver) in seven independent

191 transplantation experiments. Out of 40 mice, 26 became chimeric (11 adult BM and 15 fetal  
192 liver) and we chose the cohorts with the highest blood chimerism (4 adult BM and 11 fetal liver,  
193 see Fig. S5). The data shown in the various figures represent the fifteen fully chimeric mice that  
194 received purified LT-HSCs, and the FACS plots shown in each figure represent the analysis from  
195 the same recipient mouse.

196

### 197 ***Fluidigm single-cell multiplexed qPCR.***

198 Single-cell multiplexed qPCR experiments were performed using Fluidigm's (San Francisco,  
199 CA, USA) 96.96 qPCR DynamicArray microfluidic chips as previously described (Lawson et al.,  
200 2015). PerC cells were stained with anti- F4/80, CD5, CD19, NK1.1, Gr-1, CD11b, and I-A/I-E,  
201 then single cells were FACS-sorted into individual wells of 96-well PCR plates, using the  
202 FACSariaII. Experiments were performed following Fluidigm's Advanced Development  
203 Protocol 41. The 96-well plates were preloaded with 9  $\mu\text{L}$  of RT-STA solution: 5  $\mu\text{L}$  of CellsDirect  
204 PCR mix (Invitrogen), 0.2  $\mu\text{L}$  of SuperScript-III RT/Platinum Taq mix (Invitrogen), 1.0  $\mu\text{L}$  of a  
205 mixture of all pooled primer assays (500 nM), and 2.8  $\mu\text{L}$  of TE buffer (Promega). After sorting,  
206 PCR plates were either frozen ( $-80^{\circ}\text{C}$ ) or immediately run for reverse transcription ( $50^{\circ}\text{C}$  for 15  
207 min,  $95^{\circ}\text{C}$  for 2 min) and target-specific amplification (20 cycles; each cycle:  $95^{\circ}\text{C}$  for 15 s,  
208  $58^{\circ}\text{C}$  for 4 min). Biological replicates were performed in lieu of technical replicates per the  
209 manufacturer's recommendation, to yield more power and better sampling of the target  
210 populations. 3.6  $\mu\text{L}$  of exonuclease reaction solution (2.52  $\mu\text{L}$  sterile nuclease-free water, 0.36  
211  $\mu\text{L}$  Exo reaction buffer, and 0.72  $\mu\text{L}$  Exo-I, New England BioLabs) was then added to remove  
212 unincorporated primers ( $37^{\circ}\text{C}$  for 30 min,  $80^{\circ}\text{C}$  for 15 min), then each well was diluted 1:3 with  
213 TE buffer (Promega). A 2.7  $\mu\text{L}$  aliquot from each sample was mixed with 2.5  $\mu\text{L}$  of SsoFast  
214 EvaGreen Supermix with Low Rox (Bio-Rad) and 0.25  $\mu\text{L}$  of Fluidigm's DNA Binding Dye  
215 Sample Loading Reagent in a separate plate and centrifuged to mix solutions. Individual primer  
216 assay mixes were generated in each well of a separate plate by loading 2.5  $\mu\text{L}$  of Assay Loading  
217 Reagent (Fluidigm), 2.25  $\mu\text{L}$  DNA Suspension Buffer (TEKnova), and 0.25  $\mu\text{L}$  of 100  $\mu\text{M}$   
218 primer pair mix. Chips were primed by injecting control line fluid (Fluidigm) into each  
219 accumulator on the integrated fluidics circuit (IFC) and running the 'Prime' program prior to  
220 loading primer assays and samples. 5  $\mu\text{L}$  of each sample and primer mix were loaded into each  
221 well of the chips. Samples and assays were then mixed in the chip by running the 'Load Mix'



222 program in the IFC Controller HX. Chips were loaded into the BioMark real-time PCR reader  
223 (Fluidigm) and run following the manufacturer's protocol. A list of primer assays used in this  
224 study is provided in Table S2.

225

### 226 ***In vivo phagocytosis.***

227 Chimeric mice received 500  $\mu$ L i.p. injections of 1 mg/mL pHrodo-labeled *Escherichia coli*  
228 particles (Thermo Fisher Scientific) resuspended in defRPMI-1640. Peritoneal macrophages  
229 were isolated via PerC lavage 2 h after i.p. injection with pHrodo-labeled *E. coli*, then analyzed  
230 by Hi-D flow cytometry (as described above) and fluorescent microscopy.

231

### 232 ***Fluorescent microscopy.***

233 LPM/SPM isolated from mice 2 h after receiving pHrodo-labeled *E. coli* injections were stained  
234 with anti-F4/80 (AF488), CD19, CD11c, I-A/I-E, and CD11b, then FACS sorted directly into an  
235 8-well chamber slide in a live cell imaging solution. Cells were mounted with a ProLong<sup>®</sup>  
236 diamond antifade mountant with DAPI (Thermo Fisher Scientific) and imaged using a Leica SP5  
237 multiphoton/confocal Laser Scanning microscope at Stanford's Cell Sciences Imaging Facility.

238

### 239 ***Statistical analyses.***

240 All graphing and statistical analyses were performed using GraphPad Prism v9. Unpaired t-tests  
241 were used to determine statistical differences ( $p < 0.05$ ) where indicated. Data were analyzed  
242 for distribution (normal (Gaussian) vs. lognormal) independently using the Shapiro-Wilk  
243 test for normality in both the untransformed and Log10 transformed data. When data  
244 passed both distribution tests, the likelihood of distribution (normal vs. lognormal) was  
245 computed and QQ-plots generated for both untransformed and Log10 transformed data.  
246 When Log10 transformed data had a higher likelihood of a normal distribution (passing  
247 normal distribution test) and/or failed lognormal distribution test, parametric analyses  
248 were performed. If the data had unequal variance (as determined by a F test on both  
249 the untransformed and Log10 transformed data), Welch's T test was performed. All  
250 instances where lognormal distribution was more likely non-parametric (Mann-Whitney)  
251 tests were performed.

252



254 **Results**

255 *Tissue-resident macrophages develop and take residence during early fetal development.*

256 To investigate the moment in development that myeloid cells populate PerC and brain tissues,  
257 we determined the presence of immune cells in these compartments throughout embryonic and  
258 postnatal development in mice. This analysis demonstrated that both PerC and brain contain  
259 immune cells as early as E10, preceding development of the first LT-HSC, which has been  
260 shown to start at E10.5 (Kieusseian et al., 2012; Kumaravelu et al., 2002; Muller et al., 1994),  
261 and that these first immune cells are almost exclusively CD11b<sup>+</sup> myeloid cells (Fig. 1).  
262 Throughout prenatal development, the majority of the immune cells in the PerC are myeloid  
263 (>85%). However, during peri- and postnatal development, other immune cells (CD45<sup>+</sup>,  
264 CD11b<sup>lo</sup>, F4/80<sup>-</sup>) populate this tissue as well, resulting in ~20% of peritoneal cells being myeloid  
265 in the adult mouse (Fig. 1). Finally, we observed that in both newborn and adult animals, the  
266 majority of peritoneal MΦ are LPM (95% and 90%, respectively). Conversely, microglia remain  
267 the predominant leukocyte population in the brain throughout life. Together, these data indicate  
268 that the first wave of TRMΦ emerge and colonize tissues prior to the development of LT-HSCs.  
269 In addition, they demonstrate that the MΦ compartment in adult animals differs between  
270 peritoneal and brain tissue.

271  
272 *Tissue-resident macrophages derive from an early myeloid progenitor separate from the fetal*  
273 *LT-HSC.*

274 The observation that myeloid cells are already present in peritoneal and brain tissue before the  
275 first LT-HSC develops infers that they are derived from a separate, LT-HSC-independent source.  
276 Therefore, we next determined the fetal origin of tissue resident myeloid cells. For this, we  
277 employed a lineage tracing method, using inducible *Runx1*<sup>cre/eGFP</sup> (*Runx1*<sup>MerCreMer</sup>) mice to label  
278 yolk sac progenitors (Samokhvalov et al., 2007) and track their progeny into adult life. We  
279 labeled fetal Runx1<sup>+</sup> immune progenitor cells at E8, at which time they have been shown to be  
280 located in the yolk sac (Samokhvalov et al., 2007) and which is well before the first LT-HSC  
281 develop (Fig. 2A). A fraction of both peritoneal (~10%) and brain (~6%) macrophages in  
282 animals are derived from yolk sac progenitors that were labeled at E8 (Fig. 2D) and were  
283 maintained until adulthood (Fig. S1). Furthermore, the distribution of labeled, E8 progenitor-

284 derived M $\Phi$  in the peritoneum is very similar to that of unlabeled M $\Phi$  (i.e., the LPM/SPM ratio  
285 within GFP<sup>+</sup> and GFP<sup>-</sup> compartments), suggesting that the composition of these populations is  
286 stable throughout adult life, where the majority of peritoneal M $\Phi$  are LPM (see Fig. 2D).

287 To confirm that the E8-labeled progenitor-derived TRM $\Phi$  were not derived from fetal LT-HSC,  
288 we assessed whether any circulating LT-HSC-derived hematopoietic cells were labeled in adult  
289 animals. Assessing eGFP expression in the blood and in lymphocyte populations in the PerC  
290 confirmed the absence of multi-lineage labeling (Fig. 2B), indicating that the cells labeled at E8  
291 were not LT-HSCs, but indeed a separate myeloid progenitor, giving rise exclusively to TRM $\Phi$ .  
292 These data demonstrate that, similar to microglia, tissue-resident LPM and SPM are initially  
293 derived from a myeloid progenitor that emerges early during embryogenesis in the yolk sac and  
294 is separate from the fetal LT-HSC.

295

296 ***Fetal and adult LT-HSC transplantation reveals a dual ontogeny for tissue-resident peritoneal***  
297 ***macrophages, but not brain microglia.***

298 After determining that myeloid progenitors present in the yolk sac at E8 give rise to TRM $\Phi$ , we  
299 next asked whether LT-HSCs, which emerge at E10.5, retain the potential to generate these  
300 TRM $\Phi$ . To this end, we highly purified LT-HSCs from fetal liver (at E15) and adult bone  
301 marrow (at 24 wks of age) and transplanted ~100 purified cells into lethally irradiated mice (Fig.  
302 S4). We then analyzed the progeny of these transplanted cells in tissues of fully chimeric mice at  
303 least 33 wks after transplantation (Fig. 3A,B,S5). This analysis revealed that purified LT-HSCs  
304 from either source (fetal liver or adult BM) represent true HSCs, capable of generating all  
305 components of the immune system (Fig. 3A,S5). LT-HSCs from fetal liver exhibit a  
306 reconstitution advantage over host and rescue BM cells, which has been previously reported  
307 (Ghosn et al., 2016; van de Laar et al., 2016; Fig. 3A,S5). Moreover, both fetal and adult LT-  
308 HSCs are capable of readily generating both LPM and SPM in the peritoneum (Fig. 3C,E).  
309 However, neither fetal nor adult LT-HSCs regenerate microglia in the adult brain, even after  
310 lethal, full-body irradiation of the recipient animals (Fig. 3D,F). In contrast, we confirmed that  
311 monocytes and other blood-derived immune cells that were present in the brain preparations are  
312 derived from LT-HSCs (Fig. 3D,F), suggesting that microglia residing in the brain parenchyma  
313 are maintained independent of fetal and adult LT-HSCs or circulating monocytes. Together,

314 these data indicate that TRM $\Phi$  in the adult peritoneum, but not in the brain, require LT-HSCs for  
315 regeneration.

316

317 ***Tissue-resident peritoneal macrophages derived from LT-HSC transplants are functionally***  
318 ***comparable to their naturally occurring counterpart.***

319 Because the TRM $\Phi$  in the peritoneum can regenerate from LT-HSCs, in addition to being  
320 derived from early HSC-independent myeloid progenitors, we assessed whether peritoneal  
321 macrophages derived from LT-HSC transplantation are functionally different from their naturally  
322 developed (native) counterparts. To test this, we performed a targeted single-cell transcriptomics  
323 assay (multiplex qPCR), assessing the expression of a curated set of 77 transcription factors, on  
324 single-captured M $\Phi$  (Fig. 4A) isolated from the PerC of adult mice that were fully chimeric for  
325 transplanted fetal RFP<sup>+</sup> LT-HSCs. Analyzing the expression profile of this set of transcription  
326 factors allows for sensitive classification of cell types and hierarchical clustering of single cells  
327 into distinct cellular subtypes (Wu et al., 2014). Hierarchical clustering yielded only two distinct  
328 subsets, which, based on the size distribution of the captured cells, could be identified as LPM  
329 (Cluster 1) and SPM (Cluster 2; Fig. 4B). The transcription factor expression profiles of either  
330 LPM or SPM showed no further differences between LT-HSC-derived M $\Phi$  (RFP<sup>+</sup>) and native  
331 M $\Phi$  (RFP<sup>-</sup>) (Fig. 4C,D). Similarly, *in vivo* phagocytosis assays, assessing the uptake of *E. coli*  
332 by macrophages in the PerC, revealed that both LPM and SPM from either LT-HSCs (RFP<sup>+</sup>) or  
333 native origin (RFP<sup>-</sup>) phagocytose bacterial particles at comparable rates (Fig. 4E-G).  
334 Collectively, these findings demonstrate that transplanted fetal LT-HSC-regenerated peritoneal  
335 M $\Phi$  (RFP<sup>+</sup>) are functionally equivalent to their RFP<sup>-</sup> host counterpart.

336

337

## 338 Discussion

339 During embryonic development, the first LT-HSC emerges at E10.5, most likely from  
340 hemogenic endothelium in the yolk sac and aorta-gonad-mesonephros (AGM) (Hoeffel and  
341 Ginhoux, 2015; Kumaravelu et al., 2002; Medvinsky and Dzierzak, 1996; Muller et al., 1994).  
342 The current paradigm postulates that these LT-HSCs are capable of continually regenerating all  
343 components of the immune system, including the erythroid, lymphoid, and myeloid lineages.  
344 However, recent studies have challenged this notion by demonstrating that TRM $\Phi$  in the brain  
345 (i.e. microglia) and other tissues originate from early progenitors (~E8) that emerge in the yolk  
346 sac prior to, and independent of, the development of LT-HSCs (Ginhoux et al., 2010; Gomez  
347 Perdiguero et al., 2015a). Though it is becoming increasingly accepted that TRM $\Phi$  in the central  
348 nervous system (CNS) originate from early yolk sac-derived progenitors that arise before LT-  
349 HSCs are developed (Goldmann et al., 2016; Gomez Perdiguero et al., 2015a; Huang et al.,  
350 2018; Schulz et al., 2012; Van Hove et al., 2019), there have been conflicting reports as to the  
351 origins of TRM $\Phi$  populations outside of the CNS (Gomez Perdiguero et al., 2015a; Hoeffel et  
352 al., 2015; Sheng et al., 2015a; Yona et al., 2013). In fact, Sheng and colleagues (2015b) proposed  
353 that nearly all TRM $\Phi$  (with the exception of microglia and a fraction of Langerhans cells) are  
354 derived solely from HSCs in the fetal liver, AGM, and/or BM. Here, we demonstrate that both  
355 the peritoneum and brain contain CD11b<sup>+</sup> myeloid immune cells as early as E10 preceding  
356 development of the first LT-HSC and *Runx1*<sup>+</sup> immune progenitor cells labeled at E8 contribute  
357 to TRM $\Phi$  populations in both the peritoneum and the brain. This suggests that, at a minimum,  
358 these populations of TRM $\Phi$  in the adult are derived from yolk sac progenitors that emerge from  
359 E7.5 until at least E9.5, because they were labeled during a limited time window (approximately  
360 24 h) at E8 (Cline and Moore, 1972; Moore and Metcalf, 1970; Palis et al., 1999; Palis et al.,  
361 2001; Samokhvalov et al., 2007). Thus, our lineage tracing experiments demonstrate that tissue-  
362 resident LPM and SPM, like CNS-resident microglia, are initially developed from a yolk sac-  
363 derived myeloid progenitor that emerges early during embryogenesis and is separate from LT-  
364 HSCs, and that these cells persist throughout life.

365  
366 To directly test the potential of *bona fide* LT-HSCs, from both fetal and adult sources, to  
367 regenerate TRM $\Phi$  in the peritoneum and brain, we employed adoptive LT-HSC transplantation  
368 of solely highly purified LT-HSCs from fetal liver (E15) and adult BM (24 wks). We show that,

369 although the first wave of TRM $\Phi$  in the peritoneum and brain originate from the early E8  
370 progenitors, LT-HSC transplants can regenerate peritoneal M $\Phi$  but not tissue-resident microglia  
371 in the brain. To determine whether LT-HSC-derived M $\Phi$  can be distinguished from their host  
372 counterparts with regard to their gene expression profile, we performed a targeted single-cell  
373 transcriptomic assay (Fluidigm, multiplexed qPCR) on 77 transcription factors. We were not able  
374 to detect any significant differences between the transplanted- (RFP<sup>+</sup>) and host- (RFP<sup>-</sup>) derived  
375 LPM and SPM, suggesting that purification and transplantation of LT-HSCs does not impact the  
376 phenotype and function of the peritoneal M $\Phi$  populations that they give rise to. Taken together  
377 with the results from our *Runx1* lineage tracing experiments, we provide definitive evidence of  
378 *dual ontogeny* for peritoneal M $\Phi$ , but not brain microglia. Of note, for the first time, we show  
379 that LT-HSCs purified from fetal liver are also unable to generate microglia in the brain. These  
380 findings suggest that the microglia population within the CNS does not require LT-HSCs for  
381 TRM $\Phi$  regeneration, while peripheral tissues, such as the PerC, rely on LT-HSCs to supplement  
382 the E8 yolk sac-derived M $\Phi$ .

383

384 We propose that this difference in sourcing of M $\Phi$  progenitors reflect an evolutionary difference  
385 in the barrier function of the TRM $\Phi$  they give rise to. TRM $\Phi$  are an integral part of the body's  
386 first line of defense. However, depending on the tissue, this defense has varying requirements.  
387 The PerC is an area of the body that is prone to injury and infection, especially in rodents  
388 (Broche and Tellado, 2001; Heemken et al., 1997). Though most TRM $\Phi$  regenerate by local self-  
389 renewal (Ajami et al., 2007; Ginhoux et al., 2010; Hashimoto et al., 2013; Huang et al., 2018;  
390 Jenkins et al., 2011; Yona et al., 2013), sterile injury or inflammation-induced M $\Phi$  recruitment  
391 (and/or cell death) can rapidly deplete some TRM $\Phi$  populations, altering their turnover kinetics  
392 (Dannenberg, 2003; Lai et al., 2018; Tay et al., 2017). For example, intestinal M $\Phi$  are one of the  
393 largest M $\Phi$  pools, exhibiting rapid turnover kinetics and reliance on LT-HSC-derived circulating  
394 precursors (i.e., monocytes) to maintain normal population densities during homeostasis and  
395 inflammation (Bain et al., 2014; Platt et al., 2010). Additionally, cardiac M $\Phi$  exhibit a similar  
396 trend, where circulating precursors supplement the TRM $\Phi$  population with age, even in the  
397 absence of inflammation (Epelman et al., 2014; Molawi et al., 2014). Indeed, recent studies have  
398 revealed that cavity M $\Phi$ , notably LPM and pericardial M $\Phi$ , are recruited to injured visceral  
399 organs to help mediate clearance of dead/dying cells, promote neovascularization, and prevent

400 fibrosis (Deniset et al., 2019; Gundra et al., 2017; Wang and Kubes, 2016). Therefore, M $\Phi$  in  
401 these tissues need to be able to regenerate quickly, in order to maintain a sufficient level of  
402 protection from infection and/or injury, making them dependent on monocyte-derived M $\Phi$   
403 (MDM $\Phi$ ) in addition to local self-renewal.

404

405 In contrast, the CNS has developed in a way that minimizes the risk of inflammation, as  
406 bystander damage from inflammatory mediators could have detrimental effects on neurons,  
407 which have limited regenerative capacity. The role of microglia is to maintain and restore local  
408 homeostasis, only becoming activated if a pathogen does enter the CNS tissue, or, more often, to  
409 clear debris from dying CNS-resident cells or prune aberrant synapses (Buttgereit et al., 2016; Li  
410 and Barres, 2018; Shemer et al., 2015). They therefore self-renew to replenish, not only because  
411 they do not rely on a circulating pool of progenitors, but also because recruiting these cells from  
412 circulation could increase the risk of “unwanted” cells or pathogens entering as well. Only when  
413 there is a great need to increase M $\Phi$  numbers, due to an infection or inflammatory insult in the  
414 CNS (e.g., experimental autoimmune encephalitis), will the microglia pool be supplemented with  
415 MDM $\Phi$  (Ajami et al., 2007; Ajami et al., 2011; Huang et al., 2018). However, infiltrating  
416 MDM $\Phi$  are unable to differentiate into *bona fide* microglia and remain distinct from the resident  
417 microglia population, further supporting the notion that ontogeny, in addition to local  
418 microenvironment, influence M $\Phi$  heterogeneity (Cronk et al., 2018; Gosselin et al., 2014; Lavin  
419 et al., 2014; Shemer et al., 2018; Van Hove et al., 2019).

420

421 There is a growing interest in understanding molecular mechanisms that dictate TRM $\Phi$   
422 heterogeneity and whether ontogeny influences phenotypic and functional plasticity of these  
423 cells. There is a mounting body of evidence that suggests TRM $\Phi$  can have divergent responses  
424 when compared to infiltrating MDM $\Phi$  during inflammatory responses and disease pathogenesis  
425 (Ajami et al., 2011; Chen et al., 2019; Lai et al., 2018). In multiple visceral organs, TRM $\Phi$   
426 populations that arise independent of LT-HSCs are supplemented or replaced by MDM $\Phi$  during  
427 inflammation, aging, and/or ablative therapy (Bain et al., 2014; Bain et al., 2016; Bain et al.,  
428 2020; Cain et al., 2013; Epelman et al., 2014; Liu et al., 2019; van de Laar et al., 2016).  
429 Recruitment of LPM to sites of tissue damage, sterile injury, and/or inflammatory milieus  
430 (Deniset et al., 2019; Gundra et al., 2017; Wang and Kubes, 2016) places peritoneal M $\Phi$  into a



431 category of TRM $\Phi$  that exhibit a dual ontogeny arising from both early yolk sac progenitors and  
432 from LT-HSCs. It remains to be determined if these differences in ontogeny influence the  
433 functional capacity of M $\Phi$  in the peritoneum as evident in M $\Phi$  populations (resident vs.  
434 infiltrating) in the CNS and other tissues.

435

436 In summary, we demonstrate that the requirement for LT-HSCs to regenerate TRM $\Phi$  is tissue-  
437 specific. Though both peritoneal M $\Phi$  and microglia arise from early yolk sac-derived precursors,  
438 M $\Phi$  in the PerC, but not microglia in the brain, require LT-HSCs to maintain/regenerate their  
439 population. We propose that divergence in sourcing of M $\Phi$  progenitors, in part, reflects an  
440 evolutionary difference in the barrier function of the TRM $\Phi$  population they give rise to. These  
441 findings add a new layer to the complex developmental landscape of the myeloid lineage, where  
442 peritoneal M $\Phi$  populations exhibit a definitive dual ontogeny. Though we demonstrate that LT-  
443 HSC transplant-derived LPM and SPM are phenotypically and functionally similar to their  
444 naturally occurring, host-derived counterparts, whether there is divergence in phenotype and  
445 function between those derived from yolk sac progenitors versus fetal and adult LT-HSCs is an  
446 outstanding question, warranting further investigation.

447

448

449 **Author contributions**

450 D.E., A.K., H.K., and E.G. designed and performed experiments, analyzed data, prepared and  
451 revised the manuscript. J.W., J.S., K.Y., and M.P. performed experiments, reviewed and  
452 approved manuscript. E.G. and L.H. provided funding, project administration/supervision, and  
453 reagents. All authors discussed the results and contributed to the final manuscript.

454

455 **Acknowledgments**

456 We thank Irving L. Weissman (Stanford) for providing pCx-eGFP and TM7-RFP mice, Robert  
457 Durruthy-Durruthy (Fluidigm) for his technical direction with the single-cell multiplexed qPCR  
458 experiments, and both the Emory Pediatric/Winship Flow Cytometry Core (access supported in  
459 part by Children's Healthcare of Atlanta) and Stanford Shared FACS Facility for their support  
460 with flow cytometry experiments. This work was supported by NIH/NIAID R01AI123126 (E.G.,  
461 Emory), funds from the Lowance Center for Human Immunology (E.G., Emory), and the  
462 Herzenberg Laboratory (L.H., Stanford). D.E. was additionally supported by the Laney Graduate  
463 School Fellowship (Emory). The funders had no role in study design, data collection and  
464 analysis, decision to publish, or preparation of the manuscript.

465

466 **References**

- 467 Ajami, B., Bennett, J.L., Krieger, C., McNagny, K.M., and Rossi, F.M. (2011). Infiltrating  
468 monocytes trigger EAE progression, but do not contribute to the resident microglia pool.  
469 Nat Neurosci, 14(9), 1142-1149. <https://doi.org/10.1038/nn.2887> PMID: 21804537
- 470 Ajami, B., Bennett, J.L., Krieger, C., Tetzlaff, W., and Rossi, F.M. (2007). Local self-renewal  
471 can sustain CNS microglia maintenance and function throughout adult life. Nat Neurosci,  
472 10(12), 1538-1543. <https://doi.org/10.1038/nn2014> PMID: 18026097
- 473 Bain, C.C., Bravo-Blas, A., Scott, C.L., Perdiguero, E.G., Geissmann, F., Henri, S., Malissen, B.,  
474 Osborne, L.C., Artis, D., and Mowat, A.M. (2014). Constant replenishment from  
475 circulating monocytes maintains the macrophage pool in the intestine of adult mice. Nat  
476 Immunol, 15(10), 929-937. <https://doi.org/10.1038/ni.2967> PMID: 25151491
- 477 Bain, C.C., Gibson, D.A., Steers, N.J., Boufeva, K., Louwe, P.A., Doherty, C., Gonzalez-Huici,  
478 V., Gentek, R., Magalhaes-Pinto, M., Shaw, T., *et al.* (2020). Rate of replenishment and  
479 microenvironment contribute to the sexually dimorphic phenotype and function of  
480 peritoneal macrophages. Sci Immunol, 5(48).  
481 <https://doi.org/10.1126/sciimmunol.abc4466> PMID: 32561560
- 482 Bain, C.C., Hawley, C.A., Garner, H., Scott, C.L., Schridde, A., Steers, N.J., Mack, M., Joshi,  
483 A., Williams, M., Mowat, A.M., *et al.* (2016). Long-lived self-renewing bone marrow-  
484 derived macrophages displace embryo-derived cells to inhabit adult serous cavities. Nat  
485 Commun, 7, ncomms11852. <https://doi.org/10.1038/ncomms11852> PMID: 27292029
- 486 Baruch, K., Kertser, A., Porat, Z., and Schwartz, M. (2015). Cerebral nitric oxide represses  
487 choroid plexus NFkappaB-dependent gateway activity for leukocyte trafficking. EMBO  
488 J, 34(13), 1816-1828. <https://doi.org/10.15252/embj.201591468> PMID: 25940071
- 489 Broche, F., and Tellado, J.M. (2001). Defense mechanisms of the peritoneal cavity. Curr Opin  
490 Crit Care, 7(2), 105-116. <https://doi.org/10.1097/00075198-200104000-00009> PMID:  
491 11373519
- 492 Butovsky, O., Jedrychowski, M.P., Moore, C.S., Cialic, R., Lanser, A.J., Gabriely, G.,  
493 Koeglsperger, T., Dake, B., Wu, P.M., Doykan, C.E., *et al.* (2014). Identification of a  
494 unique TGF-beta-dependent molecular and functional signature in microglia. Nat  
495 Neurosci, 17(1), 131-143. <https://doi.org/10.1038/nn.3599> PMID: 24316888

- 496 Buttgereit, A., Lelios, I., Yu, X., Vrohligs, M., Krakoski, N.R., Gautier, E.L., Nishinakamura,  
497 R., Becher, B., and Greter, M. (2016). Sall1 is a transcriptional regulator defining  
498 microglia identity and function. *Nat Immunol*, 17(12), 1397-1406.  
499 <https://doi.org/10.1038/ni.3585> PMID: 27776109
- 500 Cain, D.W., O'Koren, E.G., Kan, M.J., Womble, M., Sempowski, G.D., Hopper, K., Gunn, M.D.,  
501 and Kelsoe, G. (2013). Identification of a tissue-specific, C/EBPbeta-dependent pathway  
502 of differentiation for murine peritoneal macrophages. *J Immunol*, 191(9), 4665-4675.  
503 <https://doi.org/10.4049/jimmunol.1300581> PMID: 24078688
- 504 Cassado Ados, A., D'Imperio Lima, M.R., and Bortoluci, K.R. (2015). Revisiting mouse  
505 peritoneal macrophages: heterogeneity, development, and function. *Front Immunol*, 6,  
506 225. <https://doi.org/10.3389/fimmu.2015.00225> PMID: 26042120
- 507 Chen, Z., Ross, J.L., and Hambardzumyan, D. (2019). Intravital 2-photon imaging reveals  
508 distinct morphology and infiltrative properties of glioblastoma-associated macrophages.  
509 *Proc Natl Acad Sci U S A*, 116(28), 14254-14259.  
510 <https://doi.org/10.1073/pnas.1902366116> PMID: 31235603
- 511 Cline, M.J., and Moore, M.A. (1972). Embryonic origin of the mouse macrophage. *Blood*, 39(6),  
512 842-849. PMID: 5028525
- 513 Copelan, E.A. (2006). Hematopoietic stem-cell transplantation. *N Engl J Med*, 354(17), 1813-  
514 1826. <https://doi.org/10.1056/NEJMra052638> PMID: 16641398
- 515 Cronk, J.C., Filiano, A.J., Louveau, A., Marin, I., Marsh, R., Ji, E., Goldman, D.H., Smirnov, I.,  
516 Geraci, N., Acton, S., *et al.* (2018). Peripherally derived macrophages can engraft the  
517 brain independent of irradiation and maintain an identity distinct from microglia. *J Exp*  
518 *Med*, 215(6), 1627-1647. <https://doi.org/10.1084/jem.20180247> PMID: 29643186
- 519 Czechowicz, A., and Weissman, I.L. (2010). Purified hematopoietic stem cell transplantation: the  
520 next generation of blood and immune replacement. *Immunol Allergy Clin North Am*,  
521 30(2), 159-171. <https://doi.org/10.1016/j.jiac.2010.03.003> PMID: 20493393
- 522 D'Souza, A., and Fretham, C. (2018). Current Uses and Outcomes of Hematopoietic Cell  
523 Transplantation (HCT): CIBMTR Summary Slides, 2018.
- 524 Dannenberg, A.M., Jr. (2003). Macrophage turnover, division and activation within developing,  
525 peak and "healed" tuberculous lesions produced in rabbits by BCG. *Tuberculosis (Edinb)*,  
526 83(4), 251-260. [https://doi.org/10.1016/s1472-9792\(03\)00048-9](https://doi.org/10.1016/s1472-9792(03)00048-9) PMID: 12906836

- 527 Davies, L.C., Jenkins, S.J., Allen, J.E., and Taylor, P.R. (2013a). Tissue-resident macrophages.  
528 Nat Immunol, 14(10), 986-995. <https://doi.org/10.1038/ni.2705> PMID: 24048120
- 529 Deniset, J.F., Belke, D., Lee, W.Y., Jorch, S.K., Deppermann, C., Hassanabad, A.F., Turnbull,  
530 J.D., Teng, G., Rozich, I., Hudspeth, K., *et al.* (2019). Gata6(+) Pericardial Cavity  
531 Macrophages Relocate to the Injured Heart and Prevent Cardiac Fibrosis. *Immunity*,  
532 51(1), 131-140 e135. <https://doi.org/10.1016/j.immuni.2019.06.010> PMID: 31315031
- 533 Engelhardt, B., Wolburg-Buchholz, K., and Wolburg, H. (2001). Involvement of the choroid  
534 plexus in central nervous system inflammation. *Microsc Res Tech*, 52(1), 112-129.  
535 [https://doi.org/10.1002/1097-0029\(20010101\)52:1<112::AID-JEMT13>3.0.CO;2-5](https://doi.org/10.1002/1097-0029(20010101)52:1<112::AID-JEMT13>3.0.CO;2-5)  
536 PMID: 11135454
- 537 Epelman, S., Lavine, K.J., Beaudin, A.E., Sojka, D.K., Carrero, J.A., Calderon, B., Brija, T.,  
538 Gautier, E.L., Ivanov, S., Satpathy, A.T., *et al.* (2014). Embryonic and adult-derived  
539 resident cardiac macrophages are maintained through distinct mechanisms at steady state  
540 and during inflammation. *Immunity*, 40(1), 91-104.  
541 <https://doi.org/10.1016/j.immuni.2013.11.019> PMID: 24439267
- 542 Ferrara, J.L., and Deeg, H.J. (1991). Graft-versus-host disease. *N Engl J Med*, 324(10), 667-674.  
543 <https://doi.org/10.1056/NEJM199103073241005> PMID: 1994250
- 544 Forrester, J.V., McMenamin, P.G., and Dando, S.J. (2018). CNS infection and immune privilege.  
545 Nat Rev Neurosci, 19(11), 655-671. <https://doi.org/10.1038/s41583-018-0070-8> PMID:  
546 30310148
- 547 Ghosn, E., Yoshimoto, M., Nakauchi, H., Weissman, I.L., and Herzenberg, L.A. (2019).  
548 Hematopoietic stem cell-independent hematopoiesis and the origins of innate-like B  
549 lymphocytes. *Development*, 146(15). <https://doi.org/10.1242/dev.170571> PMID:  
550 31371526
- 551 Ghosn, E.E., Cassado, A.A., Govoni, G.R., Fukuhara, T., Yang, Y., Monack, D.M., Bortoluci,  
552 K.R., Almeida, S.R., Herzenberg, L.A., and Herzenberg, L.A. (2010). Two physically,  
553 functionally, and developmentally distinct peritoneal macrophage subsets. *Proc Natl*  
554 *Acad Sci U S A*, 107(6), 2568-2573. <https://doi.org/10.1073/pnas.0915000107> PMID:  
555 20133793
- 556 Ghosn, E.E., Sadate-Ngatchou, P., Yang, Y., Herzenberg, L.A., and Herzenberg, L.A. (2011).  
557 Distinct progenitors for B-1 and B-2 cells are present in adult mouse spleen. *Proc Natl*

558 Acad Sci U S A, 108(7), 2879-2884. <https://doi.org/10.1073/pnas.1019764108> PMID:  
559 21282663

560 Ghosn, E.E., Waters, J., Phillips, M., Yamamoto, R., Long, B.R., Yang, Y., Gerstein, R.,  
561 Stoddart, C.A., Nakauchi, H., and Herzenberg, L.A. (2016). Fetal Hematopoietic Stem  
562 Cell Transplantation Fails to Fully Regenerate the B-Lymphocyte Compartment. *Stem*  
563 *Cell Reports*, 6(1), 137-149. <https://doi.org/10.1016/j.stemcr.2015.11.011> PMID:  
564 26724903

565 Ghosn, E.E., Yamamoto, R., Hamanaka, S., Yang, Y., Herzenberg, L.A., Nakauchi, H., and  
566 Herzenberg, L.A. (2012). Distinct B-cell lineage commitment distinguishes adult bone  
567 marrow hematopoietic stem cells. *Proc Natl Acad Sci U S A*, 109(14), 5394-5398.  
568 <https://doi.org/10.1073/pnas.1121632109> PMID: 22431624

569 Ginhoux, F., Greter, M., Leboeuf, M., Nandi, S., See, P., Gokhan, S., Mehler, M.F., Conway,  
570 S.J., Ng, L.G., Stanley, E.R., *et al.* (2010). Fate mapping analysis reveals that adult  
571 microglia derive from primitive macrophages. *Science*, 330(6005), 841-845.  
572 <https://doi.org/10.1126/science.1194637> PMID: 20966214

573 Goldmann, T., Wieghofer, P., Jordao, M.J., Prutek, F., Hagemeyer, N., Frenzel, K., Amann, L.,  
574 Staszewski, O., Kierdorf, K., Krueger, M., *et al.* (2016). Origin, fate and dynamics of  
575 macrophages at central nervous system interfaces. *Nat Immunol*, 17(7), 797-805.  
576 <https://doi.org/10.1038/ni.3423> PMID: 27135602

577 Gomez Perdiguero, E., Klapproth, K., Schulz, C., Busch, K., Azzoni, E., Crozet, L., Garner, H.,  
578 Trouillet, C., de Bruijn, M.F., Geissmann, F., and Rodewald, H.R. (2015a). Tissue-  
579 resident macrophages originate from yolk-sac-derived erythro-myeloid progenitors.  
580 *Nature*, 518(7540), 547-551. <https://doi.org/10.1038/nature13989> PMID: 25470051

581 Gomez Perdiguero, E., Klapproth, K., Schulz, C., Busch, K., de Bruijn, M., Rodewald, H.-R.,  
582 and Geissmann, F. (2015b). The origin of tissue-resident macrophages: when an erythro-  
583 myeloid progenitor is an erythro-myeloid progenitor. *Immunity*, 43(6), 1023-1024.

584 Gosselin, D., Link, V.M., Romanoski, C.E., Fonseca, G.J., Eichenfield, D.Z., Spann, N.J.,  
585 Stender, J.D., Chun, H.B., Garner, H., Geissmann, F., and Glass, C.K. (2014).  
586 Environment drives selection and function of enhancers controlling tissue-specific  
587 macrophage identities. *Cell*, 159(6), 1327-1340.  
588 <https://doi.org/10.1016/j.cell.2014.11.023> PMID: 25480297

- 589 Guillaume, T., Rubinstein, D.B., and Symann, M. (1998). Immune reconstitution and  
590 immunotherapy after autologous hematopoietic stem cell transplantation. *Blood*, 92(5),  
591 1471-1490. PMID: 9716573
- 592 Gundra, U.M., Girgis, N.M., Gonzalez, M.A., San Tang, M., Van Der Zande, H.J.P., Lin, J.D.,  
593 Ouimet, M., Ma, L.J., Poles, J., Vozhilla, N., *et al.* (2017). Vitamin A mediates  
594 conversion of monocyte-derived macrophages into tissue-resident macrophages during  
595 alternative activation. *Nat Immunol*, 18(6), 642-653. <https://doi.org/10.1038/ni.3734>  
596 PMID: 28436955
- 597 Hashimoto, D., Chow, A., Noizat, C., Teo, P., Beasley, M.B., Leboeuf, M., Becker, C.D., See,  
598 P., Price, J., Lucas, D., *et al.* (2013). Tissue-resident macrophages self-maintain locally  
599 throughout adult life with minimal contribution from circulating monocytes. *Immunity*,  
600 38(4), 792-804. <https://doi.org/10.1016/j.immuni.2013.04.004> PMID: 23601688
- 601 Heemken, R., Gandawidjaja, L., and Hau, T. (1997). Peritonitis: pathophysiology and local  
602 defense mechanisms. *Hepatology*, 44(16), 927-936. PMID: 9261580
- 603 Hoeffel, G., Chen, J., Lavin, Y., Low, D., Almeida, F.F., See, P., Beaudin, A.E., Lum, J., Low,  
604 I., Forsberg, E.C., *et al.* (2015). C-Myb(+) erythro-myeloid progenitor-derived fetal  
605 monocytes give rise to adult tissue-resident macrophages. *Immunity*, 42(4), 665-678.  
606 <https://doi.org/10.1016/j.immuni.2015.03.011> PMID: 25902481
- 607 Hoeffel, G., and Ginhoux, F. (2015). Ontogeny of Tissue-Resident Macrophages. *Front*  
608 *Immunol*, 6, 486. <https://doi.org/10.3389/fimmu.2015.00486> PMID: 26441990
- 609 Hoeffel, G., Wang, Y., Greter, M., See, P., Teo, P., Malleret, B., Leboeuf, M., Low, D., Oller,  
610 G., Almeida, F., *et al.* (2012). Adult Langerhans cells derive predominantly from  
611 embryonic fetal liver monocytes with a minor contribution of yolk sac-derived  
612 macrophages. *J Exp Med*, 209(6), 1167-1181. <https://doi.org/10.1084/jem.20120340>  
613 PMID: 22565823
- 614 Huang, Y., Xu, Z., Xiong, S., Sun, F., Qin, G., Hu, G., Wang, J., Zhao, L., Liang, Y.X., Wu, T.,  
615 *et al.* (2018). Repopulated microglia are solely derived from the proliferation of residual  
616 microglia after acute depletion. *Nat Neurosci*, 21(4), 530-540.  
617 <https://doi.org/10.1038/s41593-018-0090-8> PMID: 29472620
- 618 Jenkins, S.J., Ruckerl, D., Cook, P.C., Jones, L.H., Finkelman, F.D., van Rooijen, N.,  
619 MacDonald, A.S., and Allen, J.E. (2011). Local macrophage proliferation, rather than

620 recruitment from the blood, is a signature of TH2 inflammation. *Science*, 332(6035),  
621 1284-1288. <https://doi.org/10.1126/science.1204351> PMID: 21566158

622 Kieusseian, A., Brunet de la Grange, P., Burlen-Defranoux, O., Godin, I., and Cumano, A.  
623 (2012). Immature hematopoietic stem cells undergo maturation in the fetal liver.  
624 *Development*, 139(19), 3521-3530. <https://doi.org/10.1242/dev.079210> PMID: 22899849

625 Kumaravelu, P., Hook, L., Morrison, A.M., Ure, J., Zhao, S., Zuyev, S., Ansell, J., and  
626 Medvinsky, A. (2002). Quantitative developmental anatomy of definitive haematopoietic  
627 stem cells/long-term repopulating units (HSC/RUs): role of the aorta-gonad-mesonephros  
628 (AGM) region and the yolk sac in colonisation of the mouse embryonic liver.  
629 *Development*, 129(21), 4891-4899. PMID: 12397098

630 Kunis, G., Baruch, K., Miller, O., and Schwartz, M. (2015). Immunization with a Myelin-  
631 Derived Antigen Activates the Brain's Choroid Plexus for Recruitment of  
632 Immunoregulatory Cells to the CNS and Attenuates Disease Progression in a Mouse  
633 Model of ALS. *J Neurosci*, 35(16), 6381-6393.  
634 <https://doi.org/10.1523/JNEUROSCI.3644-14.2015> PMID: 25904790

635 Lai, S.M., Sheng, J., Gupta, P., Renia, L., Duan, K., Zolezzi, F., Karjalainen, K., Newell, E.W.,  
636 and Ruedl, C. (2018). Organ-Specific Fate, Recruitment, and Refilling Dynamics of  
637 Tissue-Resident Macrophages during Blood-Stage Malaria. *Cell Rep*, 25(11), 3099-3109  
638 e3093. <https://doi.org/10.1016/j.celrep.2018.11.059> PMID: 30540942

639 Lavin, Y., Winter, D., Blecher-Gonen, R., David, E., Keren-Shaul, H., Merad, M., Jung, S., and  
640 Amit, I. (2014). Tissue-resident macrophage enhancer landscapes are shaped by the local  
641 microenvironment. *Cell*, 159(6), 1312-1326. <https://doi.org/10.1016/j.cell.2014.11.018>  
642 PMID: 25480296

643 Lawson, D.A., Bhakta, N.R., Kessenbrock, K., Prummel, K.D., Yu, Y., Takai, K., Zhou, A.,  
644 Eyob, H., Balakrishnan, S., Wang, C.Y., *et al.* (2015). Single-cell analysis reveals a stem-  
645 cell program in human metastatic breast cancer cells. *Nature*, 526(7571), 131-135.  
646 <https://doi.org/10.1038/nature15260> PMID: 26416748

647 Li, Q., and Barres, B.A. (2018). Microglia and macrophages in brain homeostasis and disease.  
648 *Nat Rev Immunol*, 18(4), 225-242. <https://doi.org/10.1038/nri.2017.125> PMID:  
649 29151590



- 650 Liu, Z., Gu, Y., Chakarov, S., Bleriot, C., Kwok, I., Chen, X., Shin, A., Huang, W., Dress, R.J.,  
651 Dutertre, C.A., *et al.* (2019). Fate Mapping via Ms4a3-Expression History Traces  
652 Monocyte-Derived Cells. *Cell*, 178(6), 1509-1525 e1519.  
653 <https://doi.org/10.1016/j.cell.2019.08.009> PMID: 31491389
- 654 Logan, A.C., Weissman, I.L., and Shizuru, J.A. (2012). The road to purified hematopoietic stem  
655 cell transplants is paved with antibodies. *Curr Opin Immunol*, 24(5), 640-648.  
656 <https://doi.org/10.1016/j.coi.2012.08.002> PMID: 22939368
- 657 Medvinsky, A., and Dzierzak, E. (1996). Definitive hematopoiesis is autonomously initiated by  
658 the AGM region. *Cell*, 86(6), 897-906. [https://doi.org/10.1016/s0092-8674\(00\)80165-8](https://doi.org/10.1016/s0092-8674(00)80165-8)  
659 PMID: 8808625
- 660 Molawi, K., Wolf, Y., Kandalla, P.K., Favret, J., Hagemeyer, N., Frenzel, K., Pinto, A.R.,  
661 Klapproth, K., Henri, S., Malissen, B., *et al.* (2014). Progressive replacement of embryo-  
662 derived cardiac macrophages with age. *J Exp Med*, 211(11), 2151-2158.  
663 <https://doi.org/10.1084/jem.20140639> PMID: 25245760
- 664 Moore, M.A., and Metcalf, D. (1970). Ontogeny of the haemopoietic system: yolk sac origin of  
665 in vivo and in vitro colony forming cells in the developing mouse embryo. *Br J*  
666 *Haematol*, 18(3), 279-296. <https://doi.org/10.1111/j.1365-2141.1970.tb01443.x> PMID:  
667 5491581
- 668 Muller, A.M., Medvinsky, A., Strouboulis, J., Grosveld, F., and Dzierzak, E. (1994).  
669 Development of hematopoietic stem cell activity in the mouse embryo. *Immunity*, 1(4),  
670 291-301. [https://doi.org/10.1016/1074-7613\(94\)90081-7](https://doi.org/10.1016/1074-7613(94)90081-7) PMID: 7889417
- 671 Okabe, Y., and Medzhitov, R. (2014). Tissue-specific signals control reversible program of  
672 localization and functional polarization of macrophages. *Cell*, 157(4), 832-844.  
673 <https://doi.org/10.1016/j.cell.2014.04.016> PMID: 24792964
- 674 Osawa, M., Hanada, K., Hamada, H., and Nakauchi, H. (1996). Long-term lymphohematopoietic  
675 reconstitution by a single CD34-low/negative hematopoietic stem cell. *Science*,  
676 273(5272), 242-245. <https://doi.org/10.1126/science.273.5272.242> PMID: 8662508
- 677 Palis, J., Chan, R.J., Koniski, A., Patel, R., Starr, M., and Yoder, M.C. (2001). Spatial and  
678 temporal emergence of high proliferative potential hematopoietic precursors during  
679 murine embryogenesis. *Proc Natl Acad Sci U S A*, 98(8), 4528-4533.  
680 <https://doi.org/10.1073/pnas.071002398> PMID: 11296291

- 681 Palis, J., Robertson, S., Kennedy, M., Wall, C., and Keller, G. (1999). Development of erythroid  
682 and myeloid progenitors in the yolk sac and embryo proper of the mouse. *Development*,  
683 126(22), 5073-5084. PMID: 10529424
- 684 Platt, A.M., Bain, C.C., Bordon, Y., Sester, D.P., and Mowat, A.M. (2010). An independent  
685 subset of TLR expressing CCR2-dependent macrophages promotes colonic  
686 inflammation. *J Immunol*, 184(12), 6843-6854.  
687 <https://doi.org/10.4049/jimmunol.0903987> PMID: 20483766
- 688 Prinz, M., Erny, D., and Hagemeyer, N. (2017). Ontogeny and homeostasis of CNS myeloid  
689 cells. *Nat Immunol*, 18(4), 385-392. <https://doi.org/10.1038/ni.3703> PMID: 28323268
- 690 Russo, M.V., and McGavern, D.B. (2015). Immune Surveillance of the CNS following Infection  
691 and Injury. *Trends Immunol*, 36(10), 637-650. <https://doi.org/10.1016/j.it.2015.08.002>  
692 PMID: 26431941
- 693 Samokhvalov, I.M., Samokhvalova, N.I., and Nishikawa, S. (2007). Cell tracing shows the  
694 contribution of the yolk sac to adult haematopoiesis. *Nature*, 446(7139), 1056-1061.  
695 <https://doi.org/10.1038/nature05725> PMID: 17377529
- 696 Schulz, C., Gomez Perdiguero, E., Chorro, L., Szabo-Rogers, H., Cagnard, N., Kierdorf, K.,  
697 Prinz, M., Wu, B., Jacobsen, S.E., Pollard, J.W., *et al.* (2012). A lineage of myeloid cells  
698 independent of Myb and hematopoietic stem cells. *Science*, 336(6077), 86-90.  
699 <https://doi.org/10.1126/science.1219179> PMID: 22442384
- 700 Schwartz, M., and Baruch, K. (2014). The resolution of neuroinflammation in  
701 neurodegeneration: leukocyte recruitment via the choroid plexus. *EMBO J*, 33(1), 7-22.  
702 <https://doi.org/10.1002/embj.201386609> PMID: 24357543
- 703 Shemer, A., Erny, D., Jung, S., and Prinz, M. (2015). Microglia Plasticity During Health and  
704 Disease: An Immunological Perspective. *Trends Immunol*, 36(10), 614-624.  
705 <https://doi.org/10.1016/j.it.2015.08.003> PMID: 26431939
- 706 Shemer, A., Grozovski, J., Tay, T.L., Tao, J., Volaski, A., Suss, P., Ardura-Fabregat, A., Gross-  
707 Vered, M., Kim, J.S., David, E., *et al.* (2018). Engrafted parenchymal brain macrophages  
708 differ from microglia in transcriptome, chromatin landscape and response to challenge.  
709 *Nat Commun*, 9(1), 5206. <https://doi.org/10.1038/s41467-018-07548-5> PMID: 30523248

- 710 Sheng, J., Ruedl, C., and Karjalainen, K. (2015a). Most Tissue-Resident Macrophages Except  
711 Microglia Are Derived from Fetal Hematopoietic Stem Cells. *Immunity*, 43(2), 382-393.  
712 <https://doi.org/10.1016/j.immuni.2015.07.016> PMID: 26287683
- 713 Sheng, J., Ruedl, C., and Karjalainen, K. (2015b). Fetal HSCs versus EMP2s. *Immunity*, 43(6),  
714 1025. <https://doi.org/10.1016/j.immuni.2015.11.023> PMID: 26682974
- 715 Smith, L.G., Weissman, I.L., and Heimfeld, S. (1991). Clonal analysis of hematopoietic stem-  
716 cell differentiation in vivo. *Proc Natl Acad Sci U S A*, 88(7), 2788-2792.  
717 <https://doi.org/10.1073/pnas.88.7.2788> PMID: 1672767
- 718 Tay, T.L., Mai, D., Dautzenberg, J., Fernandez-Klett, F., Lin, G., Sagar, Datta, M., Drougard, A.,  
719 Stempfl, T., Ardura-Fabregat, A., *et al.* (2017). A new fate mapping system reveals  
720 context-dependent random or clonal expansion of microglia. *Nat Neurosci*, 20(6), 793-  
721 803. <https://doi.org/10.1038/nn.4547> PMID: 28414331
- 722 Till, J.E., and McCulloch, E.A. (1980). Hemopoietic stem cell differentiation. *Biochim Biophys*  
723 *Acta*, 605(4), 431-459. [https://doi.org/10.1016/0304-419x\(80\)90009-8](https://doi.org/10.1016/0304-419x(80)90009-8) PMID: 7006701
- 724 Ueno, H., and Weissman, I.L. (2006). Clonal analysis of mouse development reveals a  
725 polyclonal origin for yolk sac blood islands. *Dev Cell*, 11(4), 519-533.  
726 <https://doi.org/10.1016/j.devcel.2006.08.001> PMID: 17011491
- 727 van de Laar, L., Saelens, W., De Prijck, S., Martens, L., Scott, C.L., Van Isterdael, G.,  
728 Hoffmann, E., Beyaert, R., Saeys, Y., Lambrecht, B.N., and Guilliams, M. (2016). Yolk  
729 Sac Macrophages, Fetal Liver, and Adult Monocytes Can Colonize an Empty Niche and  
730 Develop into Functional Tissue-Resident Macrophages. *Immunity*, 44(4), 755-768.  
731 <https://doi.org/10.1016/j.immuni.2016.02.017> PMID: 26992565
- 732 van Furth, R., and Cohn, Z.A. (1968). The origin and kinetics of mononuclear phagocytes. *J Exp*  
733 *Med*, 128(3), 415-435. <https://doi.org/10.1084/jem.128.3.415> PMID: 5666958
- 734 Van Hove, H., Martens, L., Scheyltjens, I., De Vlaminck, K., Pombo Antunes, A.R., De Prijck,  
735 S., Vandamme, N., De Schepper, S., Van Isterdael, G., Scott, C.L., *et al.* (2019). A  
736 single-cell atlas of mouse brain macrophages reveals unique transcriptional identities  
737 shaped by ontogeny and tissue environment. *Nat Neurosci*, 22(6), 1021-1035.  
738 <https://doi.org/10.1038/s41593-019-0393-4> PMID: 31061494

- 739 Wang, J., and Kubes, P. (2016). A Reservoir of Mature Cavity Macrophages that Can Rapidly  
740 Invade Visceral Organs to Affect Tissue Repair. *Cell*, 165(3), 668-678.  
741 <https://doi.org/10.1016/j.cell.2016.03.009> PMID: 27062926
- 742 Wright, D.E., Cheshier, S.H., Wagers, A.J., Randall, T.D., Christensen, J.L., and Weissman, I.L.  
743 (2001). Cyclophosphamide/granulocyte colony-stimulating factor causes selective  
744 mobilization of bone marrow hematopoietic stem cells into the blood after M phase of the  
745 cell cycle. *Blood*, 97(8), 2278-2285. <https://doi.org/10.1182/blood.v97.8.2278> PMID:  
746 11290588
- 747 Wu, A.R., Neff, N.F., Kalisky, T., Dalerba, P., Treutlein, B., Rothenberg, M.E., Mburu, F.M.,  
748 Mantalas, G.L., Sim, S., Clarke, M.F., and Quake, S.R. (2014). Quantitative assessment  
749 of single-cell RNA-sequencing methods. *Nat Methods*, 11(1), 41-46.  
750 <https://doi.org/10.1038/nmeth.2694> PMID: 24141493
- 751 Wynn, T.A., Chawla, A., and Pollard, J.W. (2013). Macrophage biology in development,  
752 homeostasis and disease. *Nature*, 496(7446), 445-455.  
753 <https://doi.org/10.1038/nature12034> PMID: 23619691
- 754 Yona, S., Kim, K.W., Wolf, Y., Mildner, A., Varol, D., Breker, M., Strauss-Ayali, D., Viukov,  
755 S., Guilliams, M., Misharin, A., *et al.* (2013). Fate mapping reveals origins and dynamics  
756 of monocytes and tissue macrophages under homeostasis. *Immunity*, 38(1), 79-91.  
757 <https://doi.org/10.1016/j.immuni.2012.12.001> PMID: 23273845  
758  
759

760 **Figures**

761

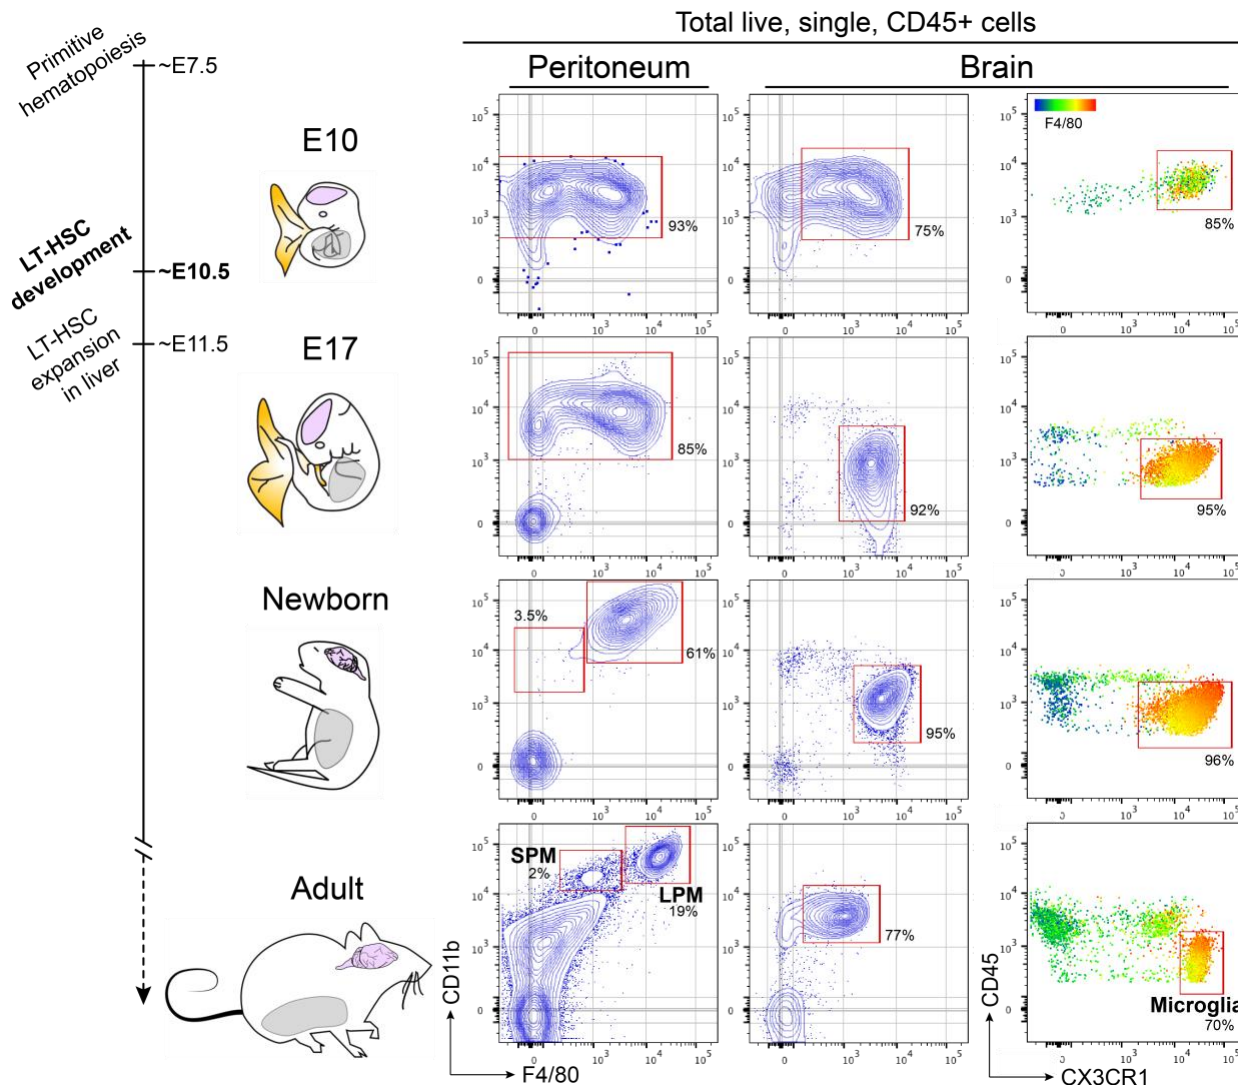

762

763 **Figure 1. Tissue-resident peritoneal and brain macrophages develop and take residence**

764 **during early fetal development.** The composition of total peritoneal and brain tissues from

765 mice at various developmental ages, analyzed by flow cytometry. The percentages of myeloid

766 cells, identified as CD11b<sup>+</sup> (peritoneum and brain) and/or CX3CR1<sup>+</sup> (brain), are shown in these

767 tissues at embryonic day 10 (E10), embryonic day 17 (E17), 2 days after birth (newborn) and >8

768 weeks (adult). SPM and LPM were additionally distinguished by F4/80 expression in peritoneal

769 tissue of newborn and adult animals. Data shown are representative of >10 mice in 3 independent

770 experiments. All cells shown were pre-gated to include only live, single cells, expressing CD45.

771

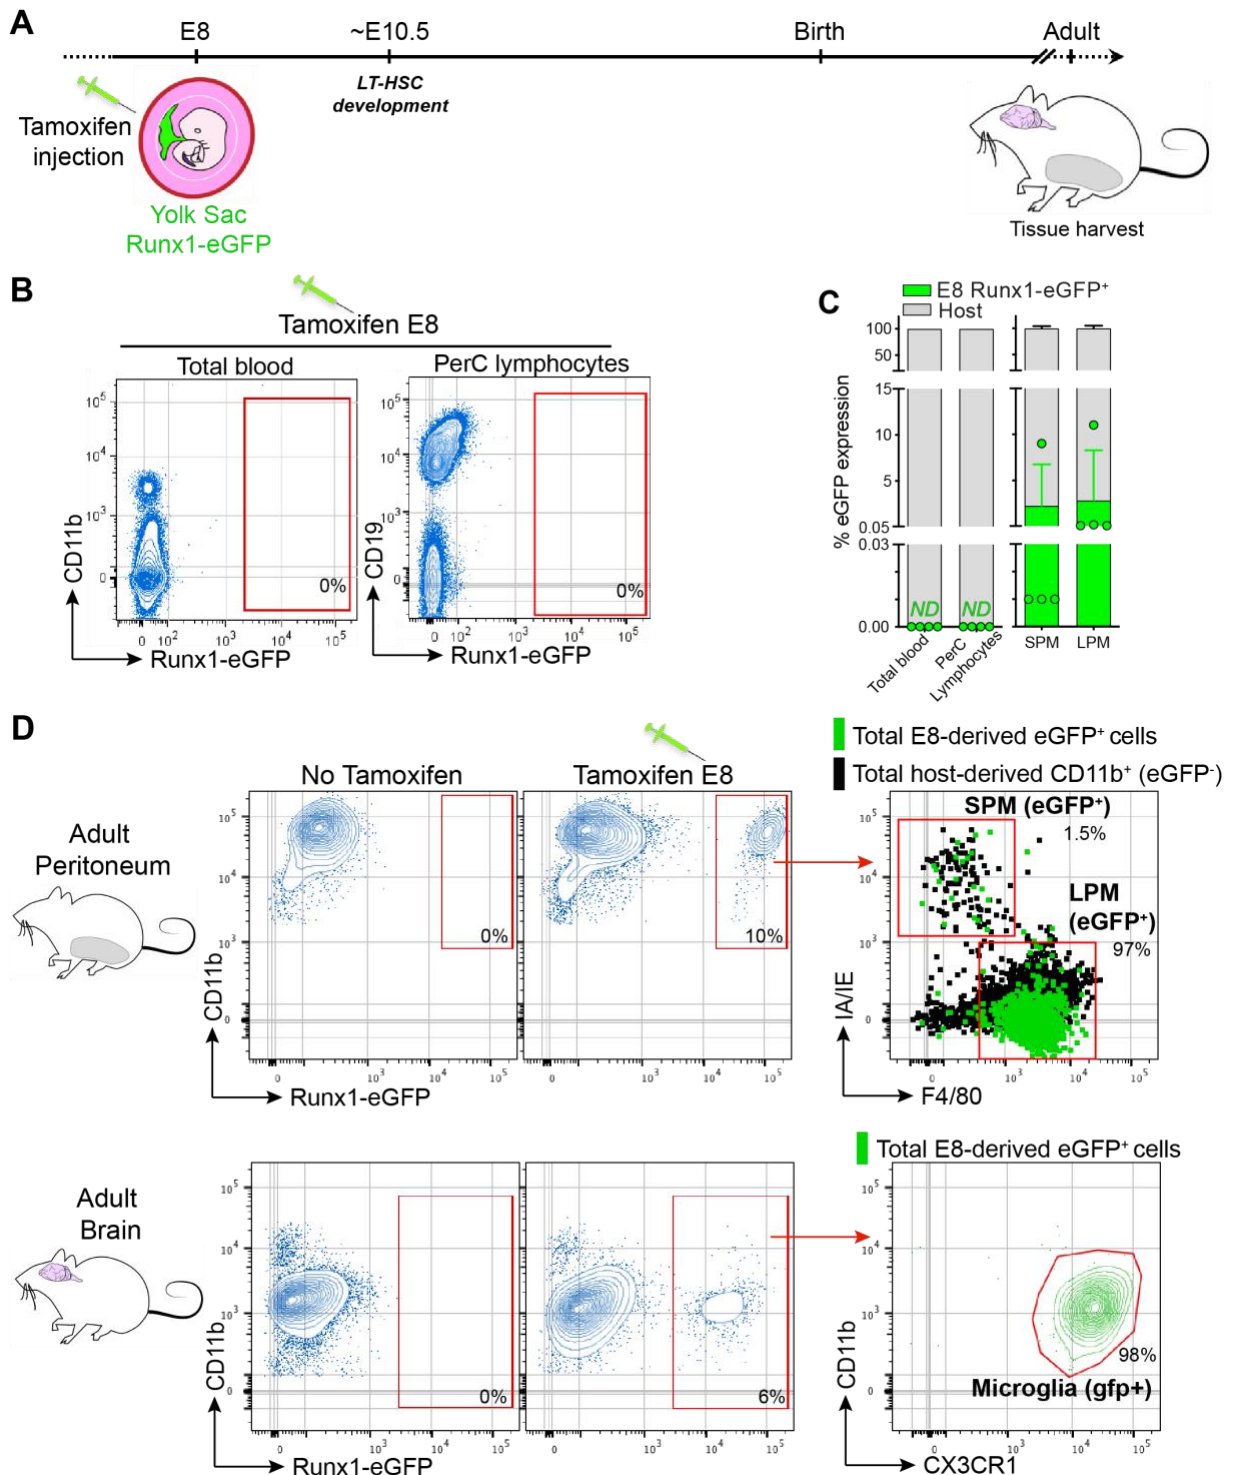

772

773 **Figure 2. Tissue-resident SPM, LPM, and microglia emerge before the development of fetal**

774 **LT-HSC.** A. Schematic overview of the lineage-tracing assays to track the progeny of fetal (E8)

775 progenitor cells. Tamoxifen was injected into pregnant *Runx1*<sup>MerCreMer</sup> x *ROSA26*<sup>mT/mG</sup> mice,

776 then peritoneum and brain were analyzed for eGFP expression in adult offspring (*Runx1*<sup>Cre/eGFP</sup>).

777 **B.** Analysis of eGFP expression in circulating cells, as well as in lymphocytes in the peritoneum,  
778 of adult mice, showing that E8 tamoxifen injection did not label hematopoietic stem cells and  
779 other lymphoid lineages. **C.** Quantification of eGFP signal in peripheral blood and PerC  
780 lymphocytes (B) and SPM/LPM (D) of *Runx1<sup>Cre/eGFP</sup>* mice. **D.** Flow cytometry analysis of tissue-  
781 resident macrophages (TRM $\Phi$ ) (CD11b<sup>+</sup>) in the peritoneum and brain of adult mice, showing the  
782 percentage of TRM $\Phi$  that are derived from E8-labeled (GFP<sup>+</sup>) progenitors. Data shown are  
783 representative of 4 mice from 3 experiments. See Figs. S2 and S3 for representative gating  
784 strategies of PerC and brain. ND = not detected.  
785

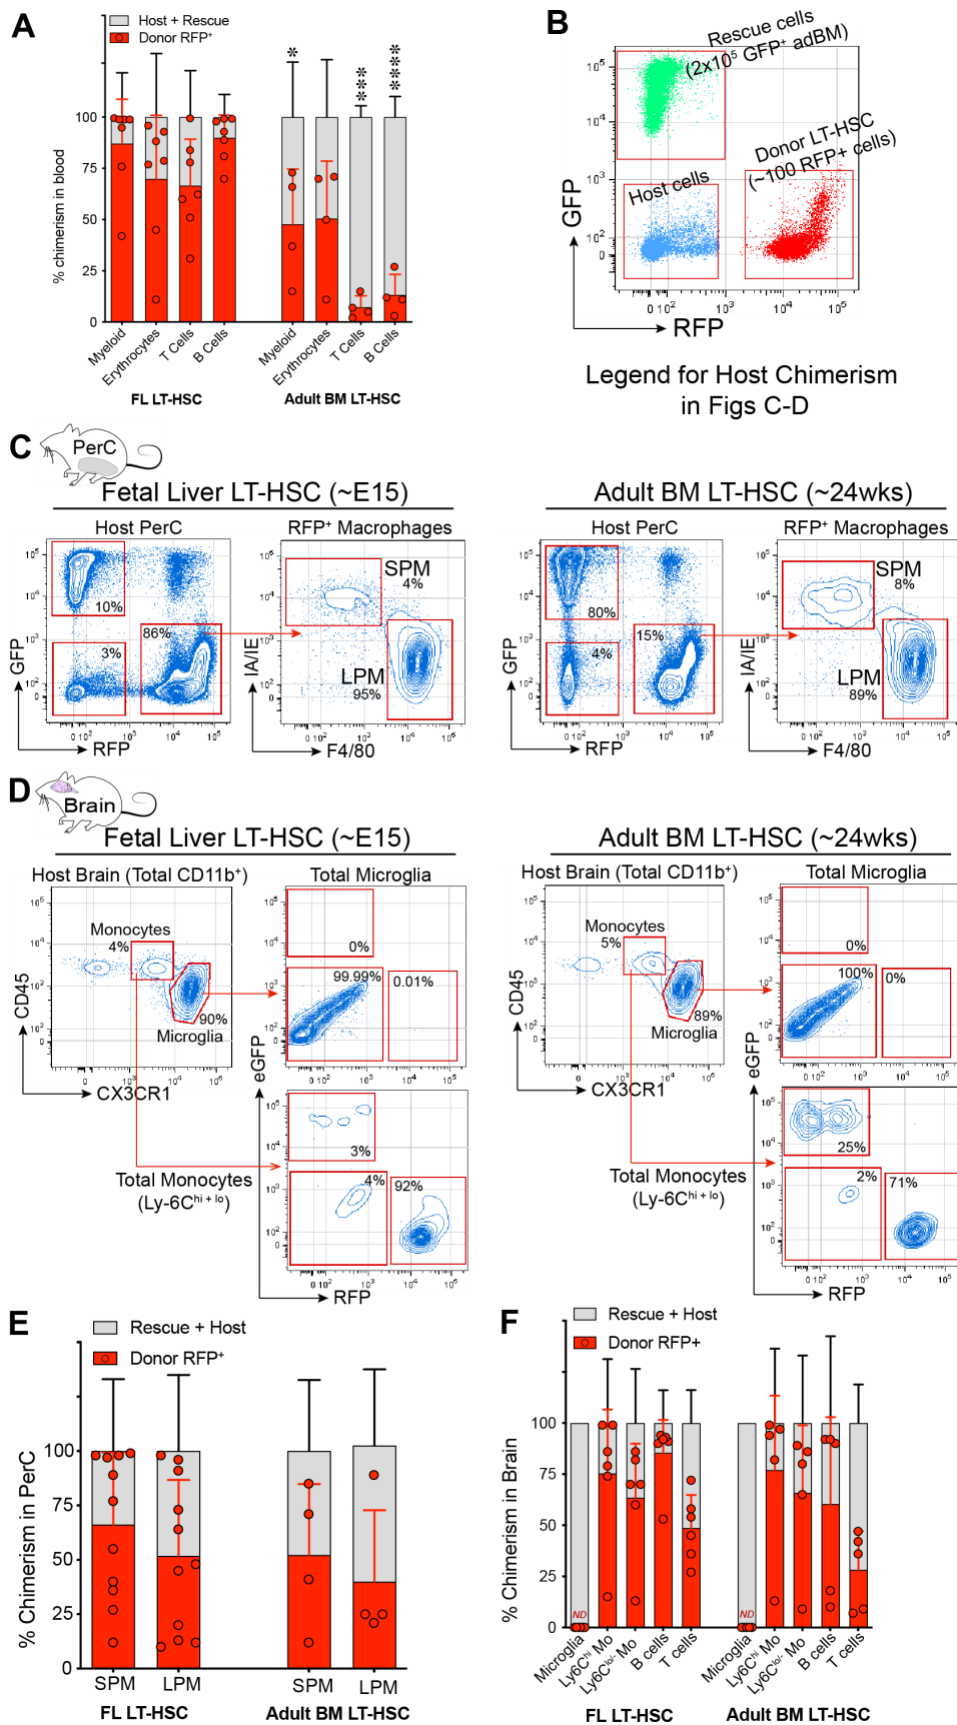



787 **Figure 3. Transplanted LT-HSC from fetal and adult origin fully regenerate tissue-resident**  
788 **peritoneal macrophages, but not brain microglia. A.** Blood chimerism rates of transplanted  
789 highly purified LT-HSC that were isolated from fetal liver (FL) or adult bone marrow (BM).  
790 Shown are the fraction of cells that were derived from transplanted (RFP<sup>+</sup>) LT-HSC, in different  
791 immune compartments in the blood of adult animals. **B.** Overview of the analysis/gating strategy  
792 to determine the progeny of transplanted purified LT-HSC. **C–D.** Analysis of RFP expression in  
793 **C)** SPM and LPM in the peritoneal cavity and **D)** microglia and monocytes in the brain of adult  
794 animals that were transplanted with purified LT-HSC that were isolated from fetal liver or adult  
795 bone marrow. **E.** Chimerism rates of transplanted (RFP<sup>+</sup>) fetal and adult LT-HSC-derived cells  
796 among SPM and LPM in the peritoneal cavity. **F.** Chimerism rates of transplanted (RFP<sup>+</sup>) fetal  
797 and adult LT-HSC-derived cells among microglia, and other immune cell subsets in the brain of  
798 recipient mice. Data shown are mean + SD (A, E and F) and representative (C and D) of the 15  
799 fully chimeric animals (4 adBM and 11 fetal). Comparisons between LT-HSC source \* p =  
800 0.0255 (unpaired t-test), \*\*\* p = 0.0003 (Welch's t-test), \*\*\*\* p = <0.0001 (unpaired t-test). ND  
801 = not detected, red points = RFP chimerism of individual replicates.  
802

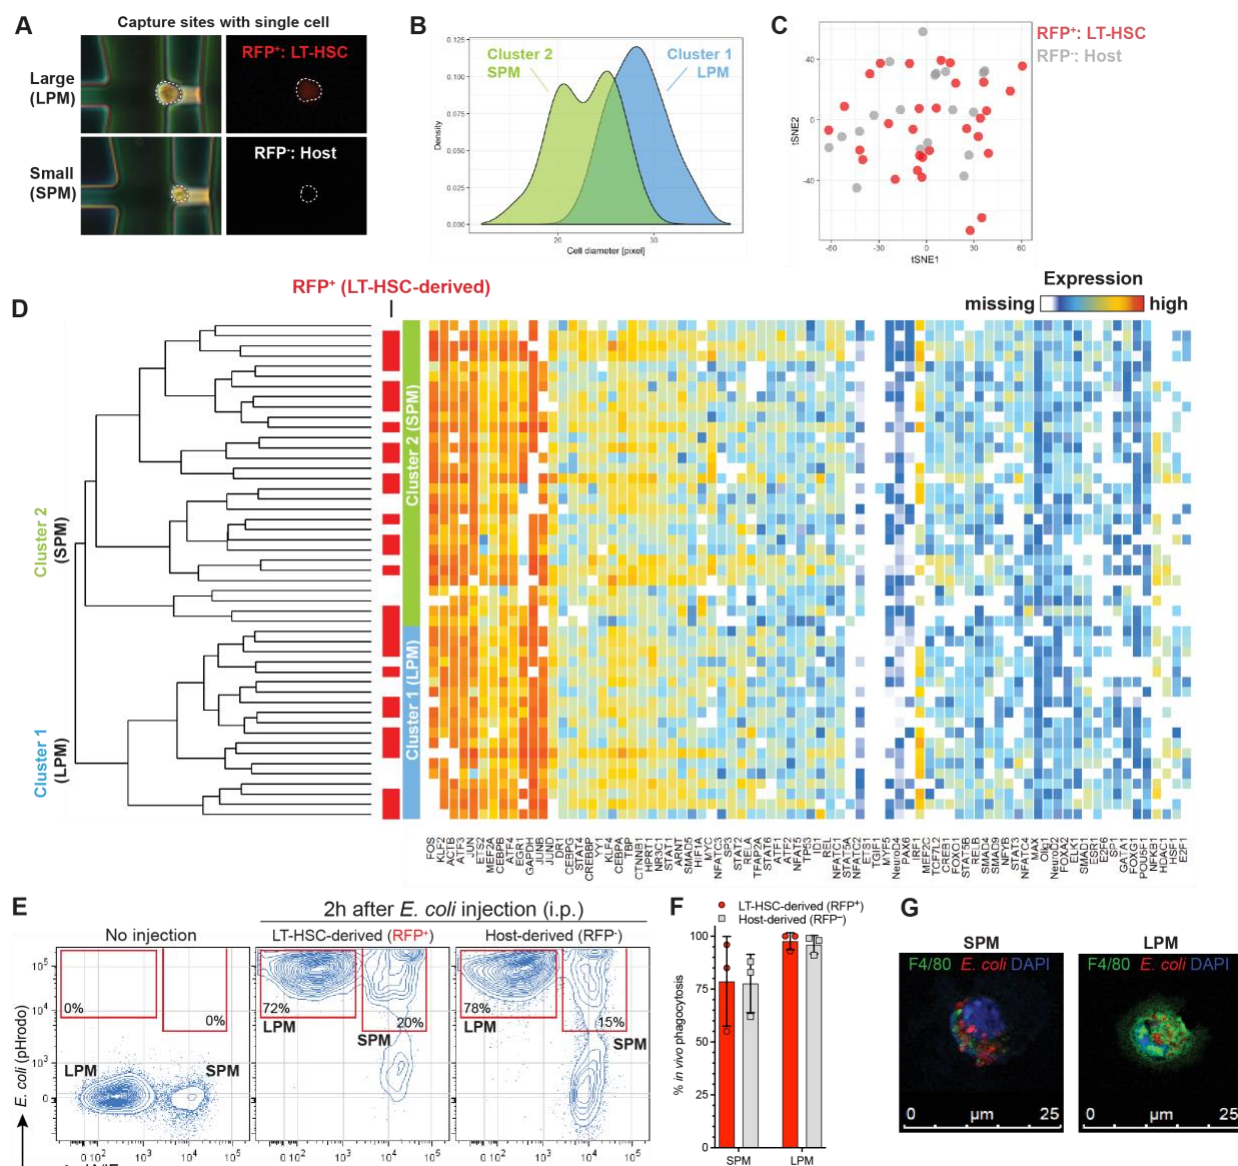

803  
804 **Figure 4. Tissue-resident peritoneal macrophages derived from LT-HSC transplants are**  
805 **functionally comparable to their host-derived counterpart.** **A.** Microscopy image of the  
806 peritoneal cells after loading them into the Fluidigm C1 fluidics chip. Bright field and  
807 fluorescence microscopy images obtained after cell loading reveals the size (small vs. large) and  
808 source (RFP<sup>+</sup> LT-HSC or RFP<sup>-</sup> host) of the SPM and LPM. **B.** Histograms depicting the size  
809 distribution of the two main cell clusters identified by hierarchical clustering of transcription  
810 factor expression profiles, shown in D. **C.** t-SNE visualization of the similarity of single isolated  
811 peritoneal macrophages derived from transplanted LT-HSC (RFP<sup>+</sup>) or host (RFP<sup>-</sup>), based on  
812 transcription factor expression profiles. The lack of defined clusters in t-SNE map indicate that

813 LT-HSC-derived macrophages are similar to their host-derived counterpart. **D.** Hierarchical  
814 clustering of transcription factor expression profiles, determined by Fluidigm Biomark single-  
815 cell multiplexed qPCR, of single-sorted peritoneal macrophages derived from transplanted LT-  
816 HSC (indicated with red bars) or host cells. Analysis yielded two main cell clusters that were  
817 identified as LPM (Cluster 1) and SPM (Cluster 2), based on their size distributions shown in B.  
818 **E.** Analysis of *in vivo* phagocytosis of pHrodo-labeled *E. coli* particles by LPM (I-A/I-E<sup>-</sup>) and  
819 SPM (I-A/I-E<sup>+</sup>) derived from transplanted LT-HSC (RFP<sup>+</sup>) or host cells (RFP<sup>-</sup>), 2 hr after i.p.  
820 injection. **F.** Quantification of *in vivo* phagocytosis of *E. coli* particles by LPM and SPM derived  
821 from transplanted LT-HSC (RFP<sup>+</sup>, red) or host cells (RFP<sup>-</sup>, gray), as percentage of cells that  
822 contained phagocytosed *E. coli* among the specific cell type. **G.** Example of morphology, F4/80  
823 expression and *E. coli* uptake by LPM and SPM. Data shown (E,F) are representative of 2  
824 independent experiments and are mean + SD of 5 total mice (2 control and 3 chimeric animals).  
827
