# Supplementary material for: Hematopoietic stem cell requirement for macrophage regeneration is tissue-specific
Source: bioRxiv or medRxiv preprint supplement (doi:10.1101/2021.04.08.439077), 2021-04-10
Supplement: Supplementary file [file media-1.pdf]

1 **Supplemental Materials**

2 **Table S1. FACS staining reagents used in this study.** Marker, format, isotype, clone, source,  
3 and catalog number for all monoclonal antibodies (mAbs) used in fluorescent cytometry  
4 experiments for this study. Combinations and staining procedures are listed in experimental  
5 methods and FMO controls were used to distinguish auto-fluorescent cells from cells expressing  
6 low levels of a particular surface marker as described (see methods).

| Marker  | Format       | Isotype              | Clone        | Source          | Catalog No. |
|---------|--------------|----------------------|--------------|-----------------|-------------|
| B220    | BV786        | Rat IgG2a, κ         | RA3-6B2      | BD Biosciences  | 563894      |
| B220    | PE-Cy7       | Rat IgG2a, κ         | RA3-6B2      | BD Biosciences  | 552772      |
| B220    | APC          | Rat IgG2a, κ         | RA3-6B2      | BD Biosciences  | 553092      |
| B220    | AF700        | Rat IgG2a, κ         | RA3-6B2      | BD Biosciences  | 553092      |
| CD11b   | APC-Cy7      | Rat IgG2b, κ         | M1/70        | BD Biosciences  | 557657      |
| CD11b   | BV711        | Rat IgG2b, κ         | M1/70        | BD Biosciences  | 563168      |
| CD11b   | Pacific Blue | Rat IgG2b, κ         | M1/70        | Invitrogen      | RM2828      |
| CD16/32 | Purified     | Rat IgG2b, κ         | 2.4G2        | BD Biosciences  | 553142      |
| CD19    | BV786        | Rat IgG2a, κ         | 1D3          | BD Biosciences  | 563333      |
| CD19    | PE-Cy5.5     | Rat IgG2a, κ         | 1D3          | Invitrogen      | 35-0193-80  |
| CD117   | BV421        | Rat IgG2b, κ         | ACK2         | BioLegend       | 135124      |
| CD127   | BV605        | Rat IgG2a, κ         | A7R34        | BioLegend       | 135041      |
| CD135   | Biotin       | Rat IgG2a, κ         | A2F10        | BioLegend       | 135308      |
| CD150   | PE-Cy7       | Rat IgG2a, λ         | TC15-12F12.2 | BioLegend       | 115914      |
| CD23    | PE           | Rat IgG2a, κ         | B3B4         | BD Biosciences  | 553139      |
| CD23    | Biotin       | Rat IgG2a, κ         | B3B4         | BD Biosciences  | 553137      |
| CD3ε    | APC          | Armenian Hamster IgG | 145-2C11     | BioLegend       | 100312      |
| CD34    | AF700        | Rat IgG2a, κ         | RAM-34       | BD Biosciences  | 560518      |
| CD38    | PE-Cy5       | Rat IgG2a, κ         | 90           | Invitrogen      | 15-0381-81  |
| CD41    | PE-Cy5.5     | Rat IgG1, κ          | MWReg30      | In-house custom | —           |
| CD41    | BV510        | Rat IgG1, κ          | MWReg30      | BioLegend       | 133923      |
| CD45    | BV570        | Rat IgG2b, κ         | 30-F11       | BioLegend       | 103136      |
| CD48    | APC-Cy7      | Armenian Hamster IgG | HM48-1       | BioLegend       | 103423      |
| CD5     | PE-Cy5       | Rat IgG2a, κ         | 53-7.3       | BioLegend       | 100610      |
| CX3CR1  | PE           | Mouse IgG2a, κ       | SA011F11     | BioLegend       | 149006      |
| F4/80   | PE-Cy7       | Rat IgG2a, κ         | BM8          | BioLegend       | 123114      |
| Gr-1    | APC          | Rat IgG2b, κ         | RB6-8C5      | BioLegend       | 108412      |
| Gr-1    | AF700        | Rat IgG2b, κ         | RB6-8C5      | BD Biosciences  | 557979      |
| Gr-1    | APC-Cy7      | Rat IgG2b, κ         | RB6-8C5      | BD Biosciences  | 557661      |
| I-A/I-E | BV650        | Rat IgG2b, κ         | M5/114.15.2  | BD Biosciences  | 563415      |
| IgK     | Biotin       | Rat IgG1, κ          | 187.1        | BD Biosciences  | 559750      |
| IgK     | APC-Cy7      | Rat IgG1, κ          | 187.1        | BD Biosciences  | 561353      |
| IgM     | AF700        |                      | 331          | In-house custom | —           |

|               |              |                          |            |                 |          |
|---------------|--------------|--------------------------|------------|-----------------|----------|
| Ly-6C         | APC          | Rat IgM, κ               | AL-21      | BD Biosciences  | 560595   |
| Sca-1         | PE           | Rat IgG2a, κ             | D7         | BioLegend       | 108108   |
| Sca-1         | PE-Cy5.5     | Rat IgG2a, κ             | D7         | Invitrogen      | MSCA18   |
| Streptavidin  | BV711        | —                        | —          | BioLegend       | 405241   |
| Streptavidin  | Qdot605      | —                        | —          | Invitrogen      | Q10101MP |
| TER-119       | PE           | Rat IgG2b, κ             | TER119     | BD Biosciences  | 553673   |
| TER-119       | APC          | Rat IgG2b, κ             | TER119     | BioLegend       | 116212   |
| Viability dye | Zombie Aqua  | —                        | —          | BioLegend       | 423102   |
| Vδ6.3/2       | PE           | Armenian Hamster IgG2, κ | 8F4H7B7    | BD Biosciences  | 555321   |
| VH11          | Pacific Blue |                          | VH11Id.6e9 | In-house custom | —        |

---

7

8

9 **Table S2. Fluidigm plate design for single cell HT-qPCR assay.** Target, RefSeq accession  
10 number, and gene symbol for the 77 targets used in Fluidigm single-cell HT-qPCR assay (in  
11 alphabetical order).  
12

| <b>Target</b> | <b>Design RefSeq</b> | <b>Gene Symbol</b> |
|---------------|----------------------|--------------------|
| Actb          | NM_007393.3          | Actb               |
| Arnt          | NM_009709.4          | Arnt               |
| Atf1          | NM_007497.3          | Atf1               |
| Atf2          | NM_009715.2          | Atf2               |
| Atf3          | NM_007498.3          | Atf3               |
| Atf4          | NM_009716.2          | Atf4               |
| Cebpa         | NM_007678.3          | Cebpa              |
| Cebpb         | NM_009883.3          | Cebpb              |
| Cebpg         | NM_009884.3          | Cebpg              |
| Creb1         | NM_001037726.1       | Creb1              |
| Crebbp        | XM_006521751.3       | Crebbp             |
| Cttnb1        | NM_007614.3          | Cttnb1             |
| Dr1           | NM_026106.3          | DR1                |
| E2f1          | NM_007891.4          | E2f1               |
| E2f6          | NM_033270.1          | E2F6               |
| Egr1          | NM_007913.5          | Egr1               |
| Elk1          | NM_007922.4          | Elk1               |
| Esr1          | NM_007956.4          | Esr1               |
| Ets1          | NM_001038642.1       | Ets1               |
| Ets2          | NM_011809.3          | Ets2               |
| Fos           | NM_010234.2          | Fos                |
| Foxa2         | NM_010446.2          | Foxa2              |
| Foxg1         | NM_001160112.1       | Foxg1              |
| Foxo1         | NM_019739.3          | Foxo1              |
| Gapdh         | NM_008084.2          | Gapdh              |
| Gata1         | NM_008089.1          | Gata1              |

|         |                |         |
|---------|----------------|---------|
| Hdac1   | NM_008228.1    | Hdac1   |
| Hif1a   | NM_010431.2    | Hif1a   |
| Hprt    | NM_013556.1    | HPRT1   |
| Hsf1    | NM_008296.2    | Hsf1    |
| Id1     | NM_010495.2    | ID1     |
| Irf1    | NM_008390.2    | Irf1    |
| Jun     | NM_010591.2    | Jun     |
| Junb    | NM_008416.2    | Junb    |
| Jund    | NM_010592.4    | Jund    |
| Klf2    | NM_008452.2    | Klf2    |
| Klf4    | NM_010637.3    | Klf4    |
| Max     | NM_008558.1    | Max     |
| Mef2a   | NM_001033713.1 | Mef2a   |
| Mef2c   | NM_001170537.1 | Mef2c   |
| Myc     | NM_010849.4    | Myc     |
| Myf5    | NM_008656.5    | Myf5    |
| Neurod2 | NM_010895.2    | Neurod2 |
| Neurod4 | NM_007501.4    | Neurod4 |
| Nfat5   | NM_018823.2    | Nfat5   |
| Nfatc1  | NM_016791.4    | Nfatc1  |
| Nfatc3  | NM_010901.2    | Nfatc3  |
| Nfatc4  | NM_023699.3    | Nfatc4  |
| Nfkb1   | NM_008689.2    | Nfkb1   |
| Nfyb    | NM_010914.1    | Nfyb    |
| Nr3c1   | NM_008173.3    | Nr3c1   |
| Olig1   | NM_016968.3    | Olig1   |
| Pax6    | NM_013627.4    | Pax6    |
| Pou5f1  | NM_013633.2    | Pou5f1  |
| Rel     | NM_009044.2    | Rel     |
| Rela    | NM_009045.4    | Rela    |
| Relb    | NM_009046.2    | Relb    |

|        |                |        |
|--------|----------------|--------|
| Smad1  | NM_008539.3    | Smad1  |
| Smad4  | XM_001001668.1 | Smad4  |
| Smad5  | NM_008541.3    | Smad5  |
| Smad9  | NM_019483.4    | Smad9  |
| Sp1    | NM_013672.2    | Sp1    |
| Sp3    | NM_001098425.1 | Sp3    |
| Stat1  | NM_009283.3    | Stat1  |
| Stat2  | NM_019963.1    | Stat2  |
| Stat3  | NM_213659.2    | Stat3  |
| Stat4  | NM_011487.4    | Stat4  |
| Stat5a | NM_011488.3    | Stat5a |
| Stat5b | NM_011489.2    | Stat5b |
| Stat6  | NM_009284.2    | Stat6  |
| Tbp    | NM_013684.3    | Tbp    |
| Tcf712 | NM_001142918.1 | Tcf712 |
| Tcf712 | NM_009333.3    | Tcf712 |
| Tfap2a | NM_011547.3    | Tfap2a |
| Tgif1  | NM_009372.2    | Tgif1  |
| Trp53  | NM_011640.2    | Trp53  |
| Yy1    | NM_009537.2    | Yy1    |

---

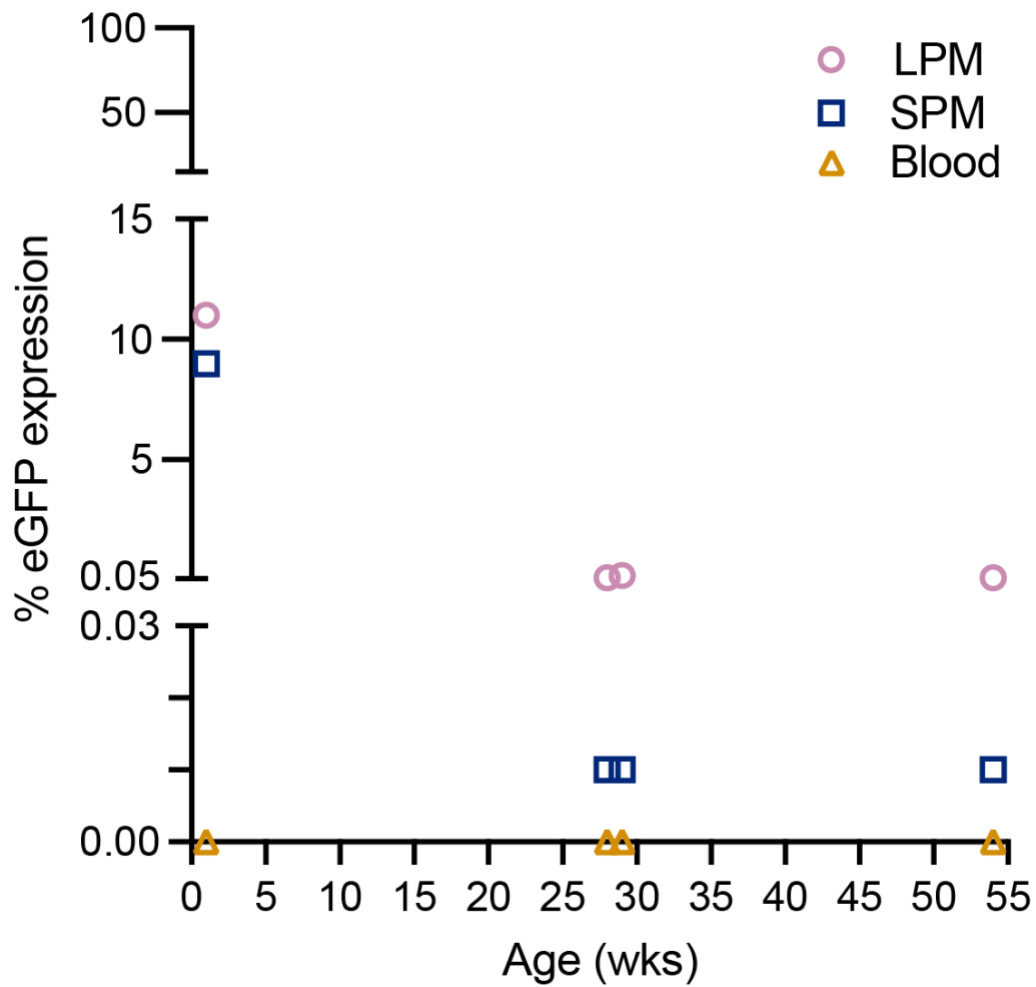

15

16 **Figure S1. Frequency of eGFP labeled cells in *Runx1* lineage tracing mice at age of**  
 17 **sacrifice.** Each individual *Runx1*<sup>cre/eGFP</sup> mouse shown in Fig. 2 is plotted at age of sacrifice to  
 18 show higher proportions of eGFP cells in the peritoneal cavity of young mice (1 wk old) that  
 19 declines with age yet persists suggesting some of the yolk-sac-derived population is likely  
 20 maintained by self-renewal of eGFP-expressing LPM and SPM.

21

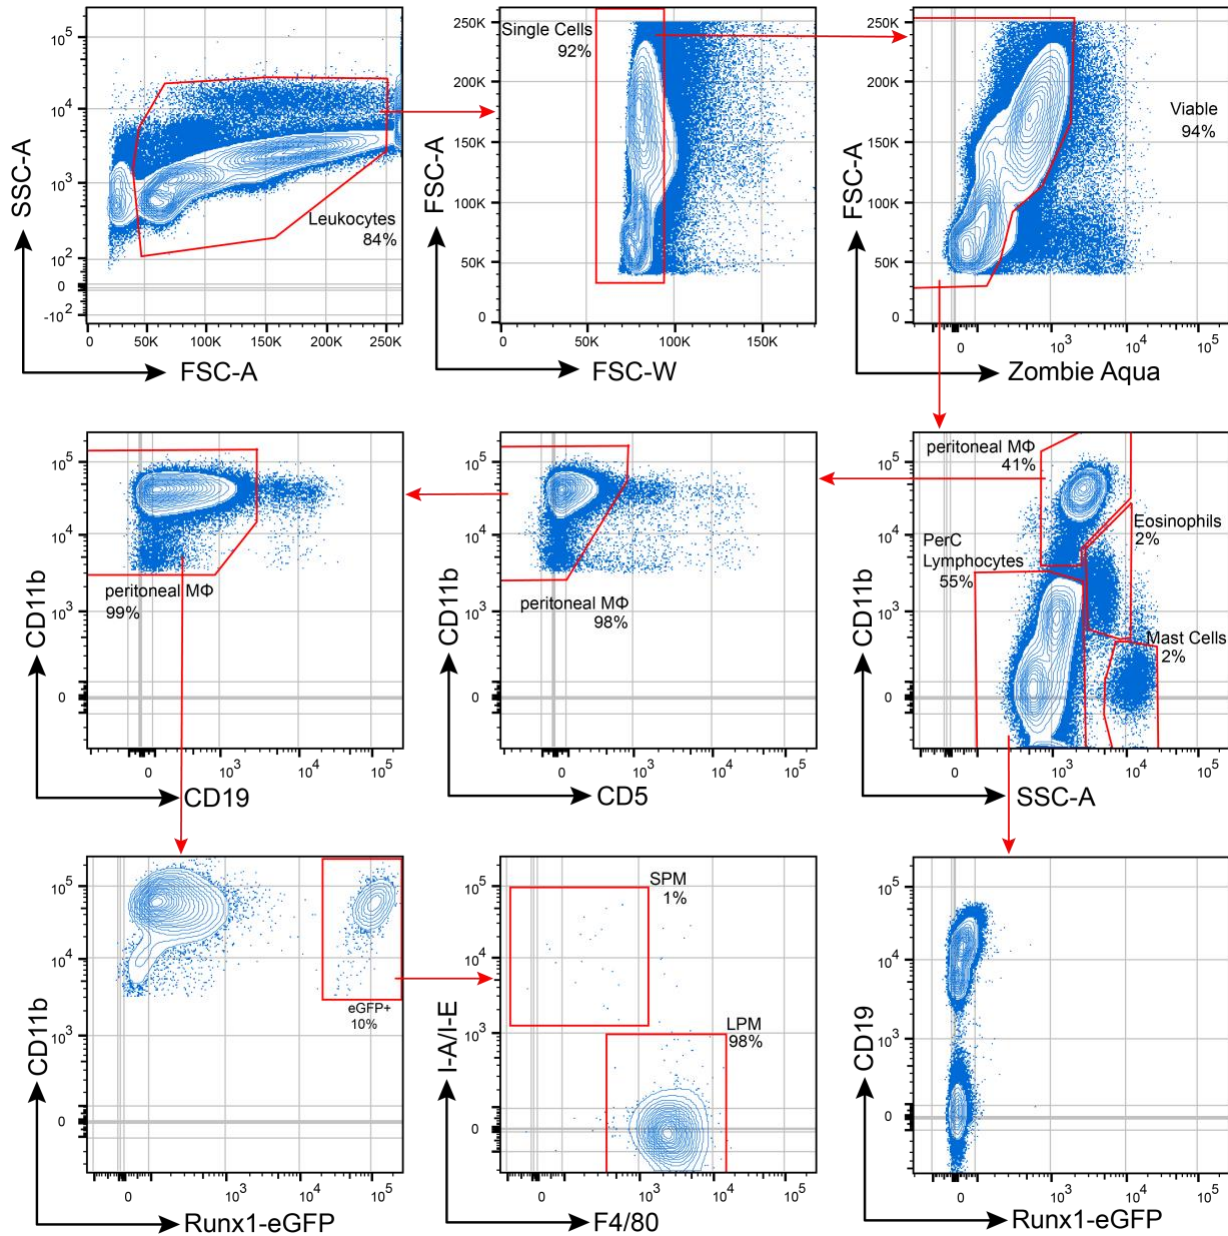

22

23 **Figure S2. Representative gating strategy–Peritoneal Cavity (PerC).** Viable, single cells  
 24 were gated first using CD11b and SSC-A to identify major immune lineages in the PerC as  
 25 previously established (Ghosn et al. 2010). Gated peritoneal macrophages (MΦ) were “cleaned:  
 26 for T/B cells doublets (removing CD5 and CD19, respectively) then fluorescent reporters  
 27 interrogated in lineage tracing (*Runx1*<sup>cre/eGFP</sup>) or transplanted mice (RFP & GFP) as shown in  
 28 Figs. 2 & 3. SPM and LPM were distinguished using I-A/I-E (MHC II) and F4/80 expression as  
 29 previously established (Ghosn et al. 2010). Gated PerC lymphocytes were interrogated for eGFP  
 30 expression in *Runx1*<sup>cre/eGFP</sup> mice to confirm that LT-HSCs were not labeled.

31



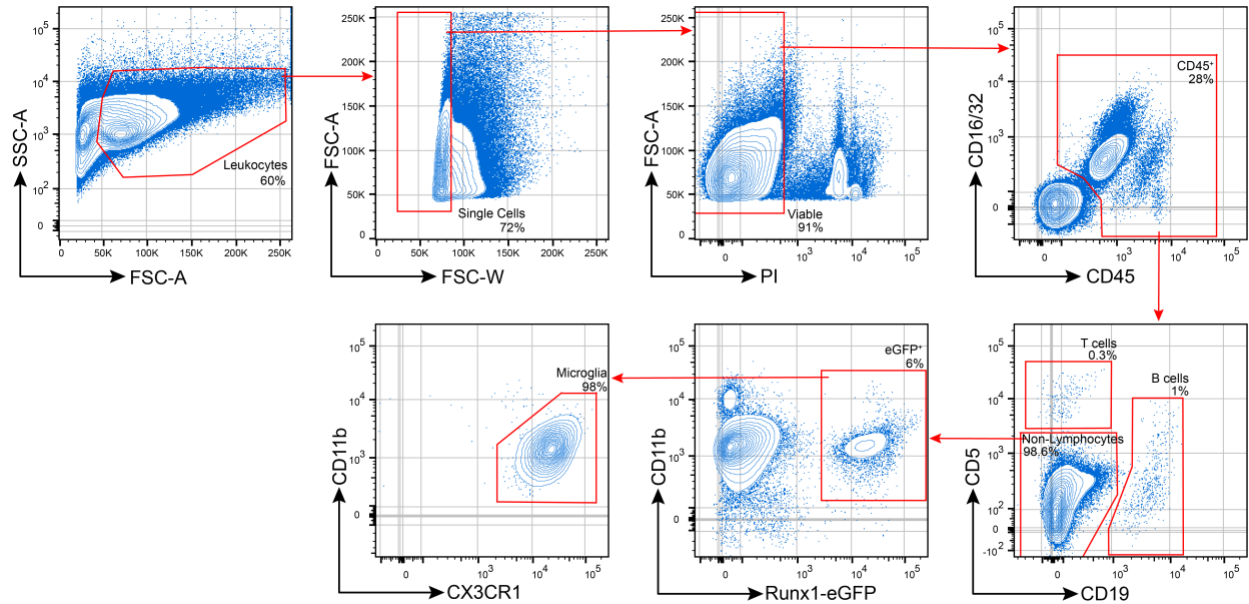

32

33 **Figure S3. Representative gating strategy–Brain.** Viable, single cells were gated for CD45+

34 cells to analyze immune populations in the brain. CD5+ T cells and CD19+ B cells were gated

35 and remaining CD11b+ cells analyzed for *Runx1*<sup>cre/eGFP</sup> expression and RFP/GFP expression in

36 transplanted mice in gates displayed in Figs. 2 & 3.

37

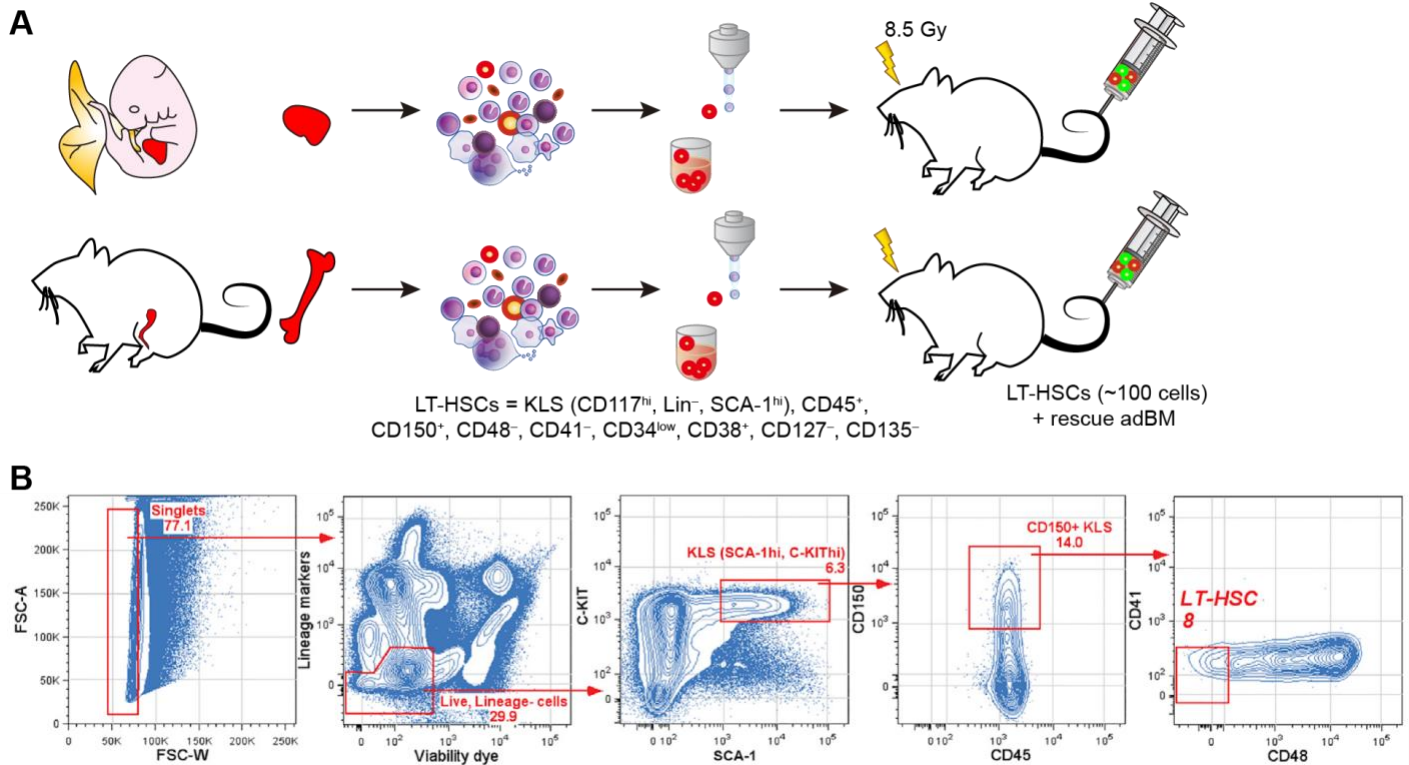

38

39 **Figure S4. LT-HSC adoptive transplantation strategy. A.** Fetal liver (E15) and adult BM  
 40 (adBM) are isolated from TM7-RFP mice and single LT-HSCs sorted as described (see methods)  
 41 for adoptive transplantation into lethally-irradiated recipient mice. Mice also received GFP<sup>+</sup>  
 42 adBM rescue cells as described at the time of LT-HSC transplantation (see methods). **B.**  
 43 Representative sorting strategy for RFP<sup>+</sup> LT-HSCs from fetal (shown here) and adBM. Adapted  
 44 from Ghosn et al. (2016).

45

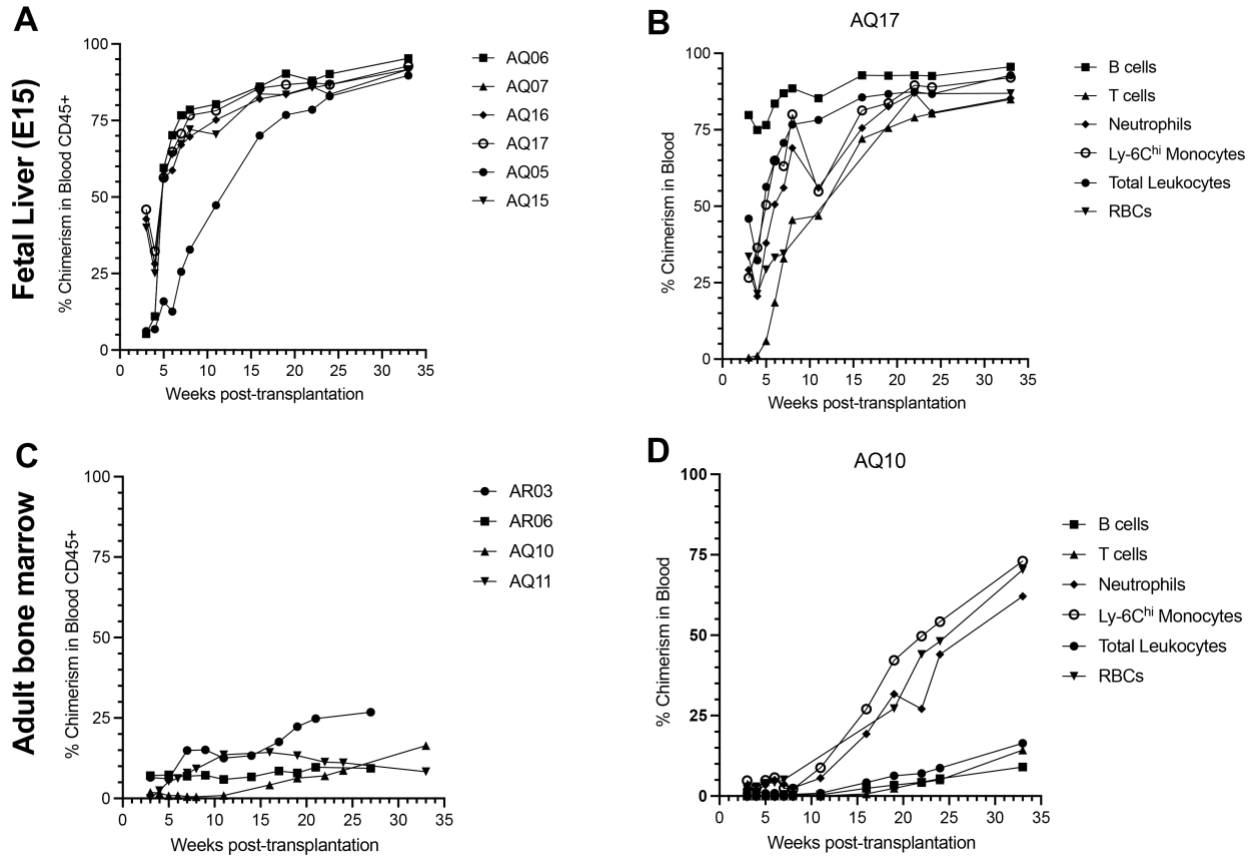

46

47 **Figure S5. Representative blood RFP chimerism kinetics of transplant recipient mice. A.**  
 48 Chimerism kinetics of total CD45<sup>+</sup> blood leukocytes for 6 representative mice that received E15  
 49 fetal liver (FL) RFP<sup>+</sup> LT-HSC transplants. **B.** Chimerism kinetics of major immune lineages  
 50 from one representative mouse that received E15 FL RFP<sup>+</sup> LT-HSC transplant. **C.** Chimerism  
 51 kinetics of total CD45<sup>+</sup> blood leukocytes for 4 mice that received adult bone marrow (adBM)  
 52 RFP<sup>+</sup> LT-HSC transplant. **D.** Chimerism kinetics of major immune lineages from one  
 53 representative mouse that received adBM RFP<sup>+</sup> LT-HSC transplant.

54
